# Supplementary material for: Substituent effects on the crystallization mechanisms of 7-chloro-4-substituted-quinolines
Source: Royal Society of Chemistry journal article supplement (doi:10.1039/d0ce00214c), 2020-01-01
Supplement: d0ce00214c1.pdf [file d0ce00214c1.pdf]

## Supporting Information

### Substituent Effects in the Crystallization Mechanisms of 7-chloro-4-substituted-Quinolines

João P. P. Copetti,<sup>[a]</sup> Paulo R. S. Salbego,<sup>[a]</sup> Tainára Orlando,<sup>[a]</sup> Jéssica M. L. Rosa,<sup>[a]</sup>  
Gabriela F. Fiss,<sup>[b]</sup> João P. G. de Oliveira,<sup>[b]</sup> Mário L. A. A. Vasconcellos,<sup>[b]</sup> Nilo  
Zanatta,<sup>[a]</sup> Helio G. Bonacorso<sup>[a]</sup> and Marcos A. P. Martins\*<sup>[a]</sup>

<sup>a</sup>Núcleo de Química de Heterociclos (NUQUIMHE), Department of Chemistry,  
Federal University of Santa Maria (UFSM), 97105-900, Santa Maria, RS, Brazil.

<sup>b</sup>Department of Chemistry, Federal University of Paraíba (UFPB), João Pessoa, PB,  
Brazil.

\*E-mail: marcos.nuquimhe@gmail.com

|                                                                        |    |
|------------------------------------------------------------------------|----|
| 1. Synthesis of compounds 4, 5 and 8 .....                             | 2  |
| 2. Crystallographic Data of new structures reported .....              | 3  |
| 3. Identification of the asymmetric unit molecules ( <i>Z'</i> ) ..... | 5  |
| 4. Symmetry codes for the supramolecular clusters .....                | 7  |
| 5. Contact area and stabilization energy data .....                    | 11 |
| 6. Normalized data .....                                               | 32 |
| 7. Concentration dependent <sup>1</sup> H-NMR experiments .....        | 34 |
| 8. Crystallization Mechanisms .....                                    | 35 |
| 9. QTAIM Data .....                                                    | 39 |
| 10. References .....                                                   | 42 |

## 1. Synthesis of compounds 4, 5 and 8

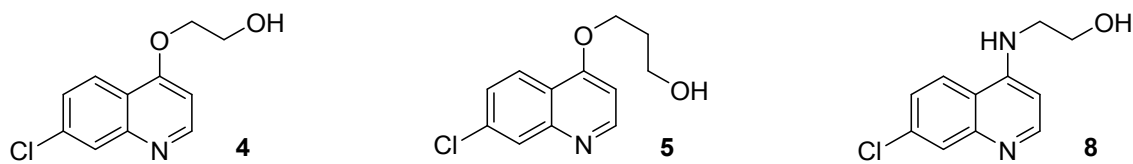

**Figure S1.** Compounds synthesized in this work.

Compound **4** and **5** were prepared following the described procedure reported Natarajan et al.<sup>1</sup> Spectroscopic data obtained are in accordance with those described by the authors.<sup>1</sup>

Compound **8** was prepared following conditions already reported by Oukoloff et al.<sup>2</sup> Spectroscopic data obtained are in accordance with those described by the authors.<sup>2</sup>

## 2. Crystallographic Data of new structures reported

**Table S1.** Crystallographic data of compounds **4**, **5** and **8**.

| Compound                                                     | <b>4</b>                                                        | <b>5</b>                                                        | <b>8</b>                                           |
|--------------------------------------------------------------|-----------------------------------------------------------------|-----------------------------------------------------------------|----------------------------------------------------|
| CCDC number                                                  | 1914635                                                         | 1568275                                                         | 1585679                                            |
| Empirical formula                                            | C <sub>11</sub> H <sub>10</sub> ClN <sub>2</sub> O <sub>2</sub> | C <sub>12</sub> H <sub>12</sub> ClN <sub>2</sub> O <sub>2</sub> | C <sub>11</sub> H <sub>11</sub> ClN <sub>2</sub> O |
| Molecular weight                                             | 223,65                                                          | 237,68                                                          | 222,67                                             |
| Temperature (K)                                              | 297(2)                                                          | 293(2)                                                          | 293(2)                                             |
| Wavelength (Å)                                               | 0.71073                                                         | 0.71073                                                         | 0.56086                                            |
| Crystal system                                               | Monoclinic                                                      | Orthorhombic                                                    | Monoclinic                                         |
| Space group                                                  | <i>P</i> 2 <sub>1</sub>                                         | <i>P</i> n a 2 <sub>1</sub>                                     | <i>P</i> 2 <sub>1</sub> / <i>n</i>                 |
| Cell parameters                                              |                                                                 |                                                                 |                                                    |
| a (Å)                                                        | 4.3139(2)                                                       | 17.4385(6)                                                      | 4.5838(2)                                          |
| b (Å)                                                        | 25.5732(14)                                                     | 4.8748(2)                                                       | 14.8986(7)                                         |
| c (Å)                                                        | 9.5710(5)                                                       | 25.7168(9)                                                      | 14.9416(7)                                         |
| α (°)                                                        | 90                                                              | 90                                                              | 90                                                 |
| β (°)                                                        | 102.074(2)                                                      | 90                                                              | 93.4840(10)                                        |
| γ (°)                                                        | 90                                                              | 90                                                              | 90                                                 |
| V (Å <sup>3</sup> )                                          | 1032.52(9)                                                      | 2186.16(14)                                                     | 1018.51(8)                                         |
| Z                                                            | 4                                                               | 8                                                               | 4                                                  |
| Calc. density (Mg m <sup>-3</sup> )                          | 1.439                                                           | 1.444                                                           | 1.452                                              |
| Abs. Coef. (mm <sup>-1</sup> )                               | 0.347                                                           | 0.332                                                           | 0.185                                              |
| F (000)                                                      | 464                                                             | 992                                                             | 464                                                |
| Crystal size (mm)                                            | 0.247 x 0.123 x 0.052                                           | 0.375 x 0.262 x 0.140                                           | 0.53 x 0.19 x 0.16                                 |
| θ range for data collection (°)                              | 2.317 to 27.128                                                 | 2.336 to 30.939                                                 | 2.41 to 21.086                                     |
| Reflections collected/unique                                 | 17777 / 4540<br>[R(int) = 0.0379]                               | 26505 / 5734 [R(int) = 0.0189]                                  | 14860 / 2235<br>[R(int) = 0.0377]                  |
| Completeness to theta (%)                                    | 99.6                                                            | 98.9                                                            | 99.7                                               |
| Absorption correction                                        | Multi-scan                                                      | Multi-scan                                                      | Multi-scan                                         |
| Max. and min. transmission                                   | 0.7455 and 0.7057                                               | 0.7461 and 0.7127                                               | 0.7446 and 0.6687                                  |
| Refinement method                                            | Full-matrix least-squares on F <sup>2</sup>                     | Full-matrix least-squares on F <sup>2</sup>                     | Full-matrix least-squares on F <sup>2</sup>        |
| Data/restraints/parameters                                   | 4540 / 1 / 273                                                  | 5734 / 1 / 289                                                  | 2235 / 0 / 136                                     |
| Goodness of fit on F <sup>2</sup>                            | 1.021                                                           | 1.040                                                           | 1.045                                              |
| Final R indices                                              | R1 = 0.0411, wR2 = 0.0786                                       | R1 = 0.0266, wR2 = 0.0682                                       | R1 = 0.0341, wR2 = 0.0953                          |
| R all data                                                   | R1 = 0.0624, wR2 = 0.0844                                       | R1 = 0.0292, wR2 = 0.0696                                       | R1 = 0.0434, wR2 = 0.1008                          |
| Extinction coefficient                                       | None                                                            | None                                                            | None                                               |
| Δρ <sub>max</sub> and Δρ <sub>min</sub> (e.Å <sup>-3</sup> ) | 0.226 and -0.183                                                | 0.268 and -0.226                                                | 0.348 and -0.364                                   |

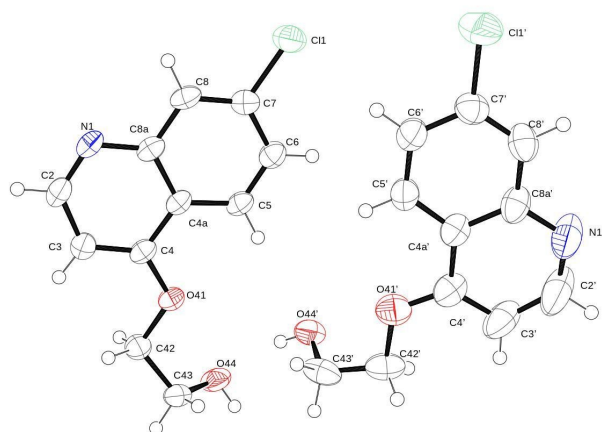

**Figure S2.** Asymmetric unit of compound **4**, represented by ORTEP diagrams with thermic ellipsoids drawn with 50% of probability.

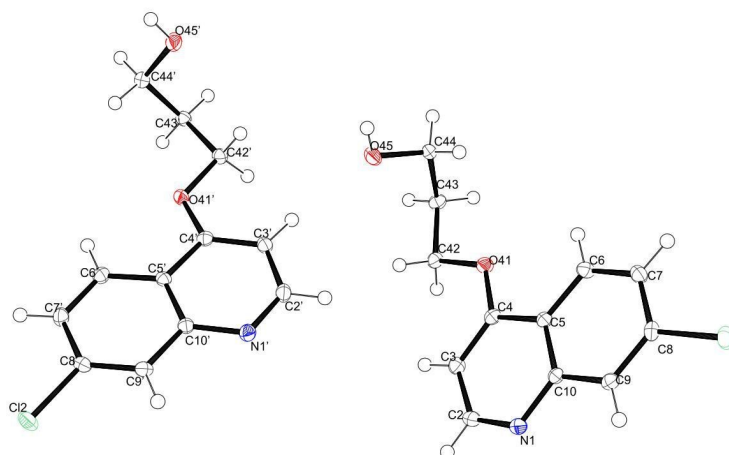

**Figure S3.** Asymmetric unit of compound **5**, represented by ORTEP diagrams with thermic ellipsoids drawn with 50% of probability.

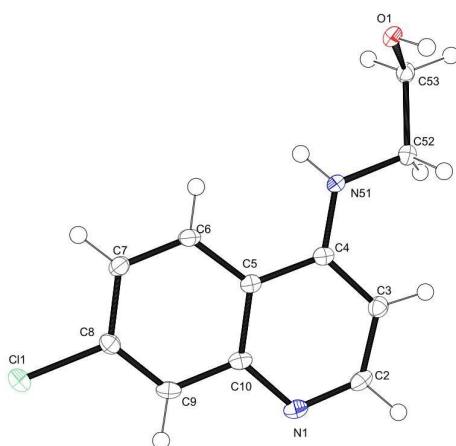

**Figure S4.** Asymmetric unit of compound **8**, represented by ORTEP diagrams with thermic ellipsoids drawn with 50% of probability.

### 3. Identification of the asymmetric unit molecules ( $Z'$ )

Observation: Hydrogen atoms are omitted for clarity.

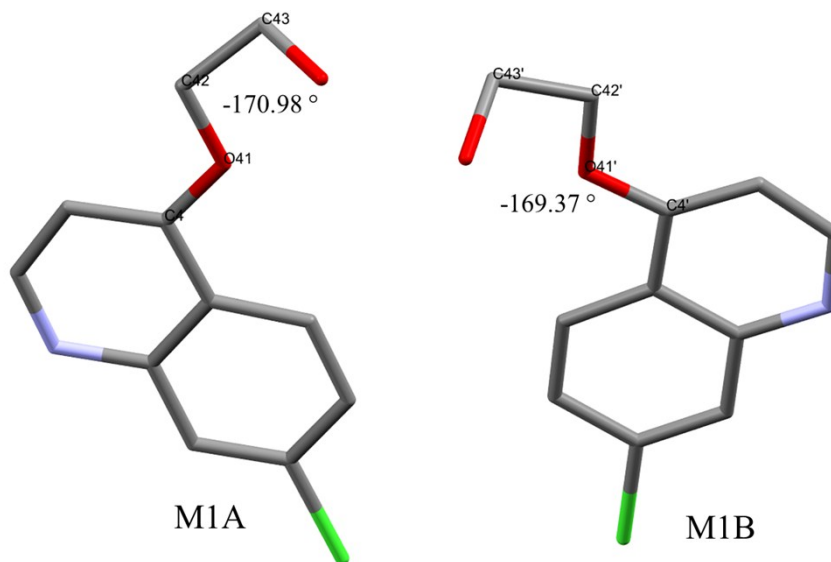

**Figure S5.** Asymmetric unit molecules for compound 4. Torsion angles of  $-170.98^\circ$  (M1A) e  $-169.37^\circ$  (M1B) between the atoms C4-O41-C42-C43 and C4'-O41'-C42'-C43', respectively.

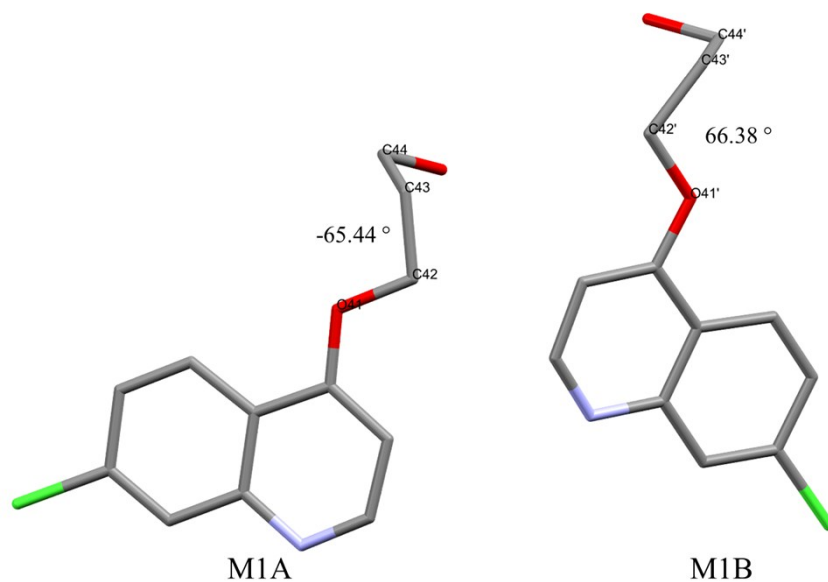

**Figure S6.** Asymmetric unit molecules for compound 5. Torsion angles of  $-65.44^\circ$  (M1A) and  $66.38^\circ$  (M1B) between atoms C44-C43-C42-O41 and C44'-C43'-C42'-O41', respectively.

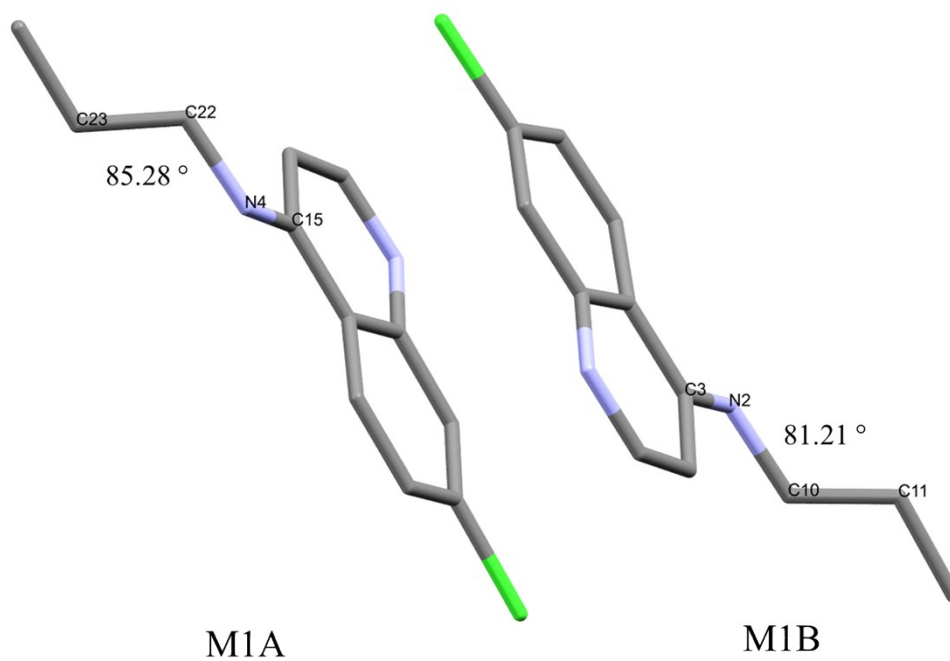

**Figure S7.** Asymmetric unit molecules for compound **6**. Torsions of  $85.28^\circ$  (M1A) e  $81.21^\circ$  (M1B) between the atoms C15-N4-C22-C23 and C3-N2-C10-C11, respectively.

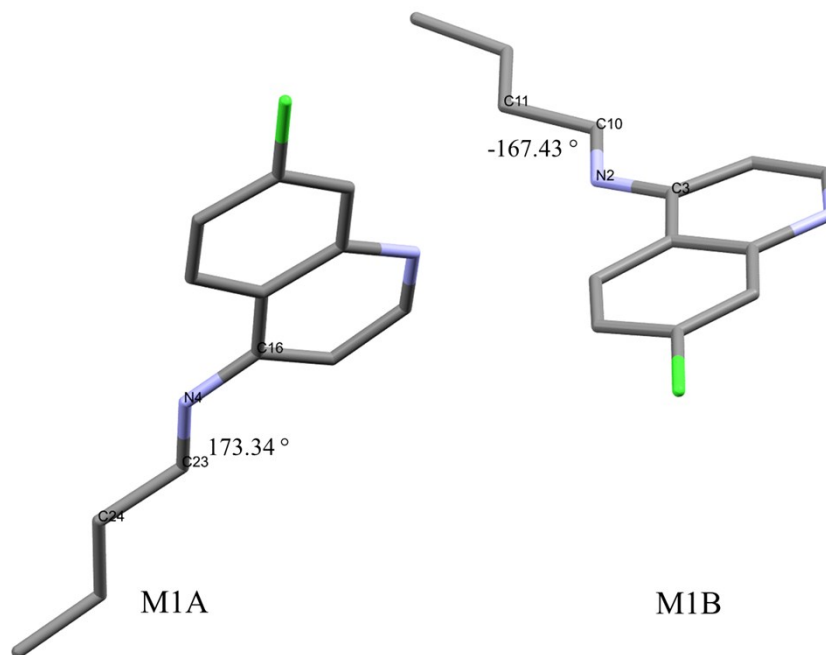

**Figure S8.** Asymmetric unit molecules for compound **7**. Torsions of  $173.34^\circ$  (M1A) and  $-167.43^\circ$  (M1B) between the atoms C16-N4-C23-C24 and C3-N2-C10-C11 respectively.

#### 4. Symmetry codes for the supramolecular clusters

**Table S2.** Symmetry codes of the molecules that compose the supramolecular cluster of compounds **1**, **2** and **3**.

| Molecule | Symmetry Code      |                    |                  |
|----------|--------------------|--------------------|------------------|
|          | <b>1</b>           | <b>2</b>           | <b>3</b>         |
| M1       | x,y,z              | x,y,z              | x,y,z            |
| M2       | -1+x,y,z           | -1+x,y,z           | -1+x,y,z         |
| M3       | 1+x,y,z            | 1+x,y,z            | 1+x,y,z          |
| M4       | 1-x,-y,-z          | 2-x,-y,-z          | -0.5+x,0.5-y,1-z |
| M5       | 2-x,-y,-z          | 1-x,1-y,-z         | 0.5+x,0.5-y,1-z  |
| M6       | 1-x,1-y,-z         | 2-x,1-y,-z         | -0.5+x,1.5-y,1-z |
| M7       | 2-x,1-y,-z         | 1-x,2-y,-z         | 0.5+x,1.5-y,1-z  |
| M8       | -1+x,1+y,z         | -1+x,1+y,z         | -1+x,1+y,z       |
| M9       | x,1+y,z            | x,1+y,z            | x,1+y,z          |
| M10      | 0.5-x,0.5+y,0.5-z  | 0.5-x,0.5+y,0.5-z  | -x,0.5+y,1.5-z   |
| M11      | 1.5-x,0.5+y,0.5-z  | 1.5-x,0.5+y,0.5-z  | 1-x,0.5+y,1.5-z  |
| M12      | 0.5-x,-0.5+y,0.5-z | 0.5-x,-0.5+y,0.5-z | -x,-0.5+y,1.5-z  |
| M13      | 1.5-x,-0.5+y,0.5-z | 1.5-x,-0.5+y,0.5-z | 1-x,-0.5+y,1.5-z |
| M14      | x,-1+y,z           | x,-1+y,z           | x,-1+y,z         |
| M15      | 1+x,-1+y,z         | 1+x,-1+y,z         | 1+x,-1+y,z       |

**Table S3.** Symmetry codes of the molecules that compose the supramolecular cluster of compounds **4 (M1A,M1B)** and **5 (M1A, M1B)**.

| Molecule | Symmetry Code |                |                    |                     |
|----------|---------------|----------------|--------------------|---------------------|
|          | <b>4M1A</b>   | <b>4M1B</b>    | <b>5M1A</b>        | <b>5M1B</b>         |
| M1       | x,y,z         | x,y,z          | x,y,z              | x,y,z               |
| M2       | -1+x,y,z      | 1+x,y,z        | x,1+y,z            | x,-1+y,z            |
| M3       | 1+x,y,z       | -1+x,y,z       | x,-1+y,z           | x,1+y,z             |
| M4       | -1+x,y,z      | 2+x,y,1+z      | 1.5-x,0.5+y,0.5+z  | 1.5-x,-0.5+y,-0.5+z |
| M5       | x,y,z         | 1+x,y,1+z      | 1.5-x,-0.5+y,0.5+z | 1.5-x,0.5+y,-0.5+z  |
| M6       | 1+x,y,z       | x,y,1+z        | 1-x,1-y,0.5+z      | 1-x,-y,-0.5+z       |
| M7       | -2+x,y,-1+z   | 1+x,y,z        | 1-x,-y,0.5+z       | 1-x,1-y,-0.5+z      |
| M8       | -1+x,y,-1+z   | x,y,z          | -0.5+x,1.5-y,z     | -0.5+x,0.5-y,z      |
| M9       | x,y,-1+z      | -1+x,y,z       | -0.5+x,0.5-y,z     | -0.5+x,1.5-y,z      |
| M10      | -x,0.5+y,1-z  | -1+x,y,-1+z    | x,1+y,z            | -0.5+x,0.5-y,z      |
| M11      | 1-x,0.5+y,1-z | -2+x,y,-1+z    | x,y,z              | -0.5+x,1.5-y,z      |
| M12      | 1-x,0.5+y,2-z | x,y,-1+z       | 0.5+x,1.5-y,z      | x,-1+y,z            |
| M13      | 2-x,0.5+y,2-z | -1+x,y,-1+z    | 0.5+x,0.5-y,z      | x,y,z               |
| M14      | x,y,1+z       | -2+x,y,-1+z    | 0.5+x,1.5-y,z      | 0.5+x,0.5-y,z       |
| M15      | 1+x,y,1+z     | 1-x,-0.5+y,1-z | 0.5+x,0.5-y,z      | 0.5+x,1.5-y,z       |
| M16      | 2+x,y,1+z     | -x,-0.5+y,1-z  | -                  | -                   |
| M17      | 1+x,y,1+z     | 2-x,-0.5+y,2-z | -                  | -                   |
| M18      | 2+x,y,1+z     | 1-x,-0.5+y,2-z | -                  | -                   |

**Table S4.** Symmetry codes of the molecules that compose the supramolecular cluster of compound **6** dimeric nuclei.

| Dimer | Symmetry Code     |                   |
|-------|-------------------|-------------------|
|       | <b>6</b>          |                   |
| D1    | x,y,z             | x,y,z             |
| D2    | -1+x,y,z          | -1+x,y,z          |
| D3    | 1+x,y,z           | 1+x,y,z           |
| D4    | 1-x,0.5+y,1.5-z   | 1-x,0.5+y,1.5-z   |
| D5    | 2-x,0.5+y,1.5-z   | 2-x,0.5+y,1.5-z   |
| D6    | -1+x,0.5-y,0.5+z  | -1+x,0.5-y,0.5+z  |
| D7    | x,0.5-y,0.5+z     | x,0.5-y,0.5+z     |
| D8    | 1+x,0.5-y,0.5+z   | 1+x,0.5-y,0.5+z   |
| D9    | 1-x,-0.5+y,1.5-z  | 1-x,-0.5+y,1.5-z  |
| D10   | 2-x,-0.5+y,1.5-z  | 2-x,-0.5+y,1.5-z  |
| D11   | 1-x,-y,1-z        | 1-x,-y,1-z        |
| D12   | 2-x,-y,1-z        | 2-x,-y,1-z        |
| D13   | -1+x,0.5-y,-0.5+z | -1+x,0.5-y,-0.5+z |
| D14   | x,0.5-y,-0.5+z    | x,0.5-y,-0.5+z    |
| D15   | 1+x,0.5-y,-0.5+z  | 1+x,0.5-y,-0.5+z  |
| D16   | 2-x,1-y,1-z       | 2-x,1-y,1-z       |
| D17   | 3-x,1-y,1-z       | 3-x,1-y,1-z       |

**Table S5.** Symmetry codes of the molecules that compose the supramolecular cluster of compounds **7** (**7M1A**, **7M1B**) and **8**.

| Molecule | Symmetry Code    |                  |                     |
|----------|------------------|------------------|---------------------|
|          | <b>7M1A</b>      | <b>7M1B</b>      | <b>8</b>            |
| M1       | x,y,z            | x,y,z            | x,y,z               |
| M2       | 1-x,-y,1-z       | -0.5+x,y,1.5-z   | 1+x,y,z             |
| M3       | 2-x,-y,1-z       | 0.5+x,y,1.5-z    | -1+x,y,z            |
| M4       | 1.5-x,-0.5+y,z   | 1-x,-0.5+y,1.5-z | 3-x,1-y,2-z         |
| M5       | 1-x,-y,1-z       | 1.5-x,-0.5+y,z   | 2-x,1-y,2-z         |
| M6       | 1.5-x,-y,-0.5+z  | -1+x,y,z         | 1.5-x,0.5+y,1.5-z   |
| M7       | 2-x,-y,1-z       | 1-x,-y,1-z       | 0.5-x,0.5+y,1.5-z   |
| M8       | 2.5-x,-y,-0.5+z  | x,y,z            | 1-x,1-y,1-z         |
| M9       | 0.5+x,0.5-y,1-z  | 2-x,-y,1-z       | -x,1-y,1-z          |
| M10      | 1+x,0.5-y,-0.5+z | -1.5+x,0.5-y,1-z | -1-x,1-y,1-z        |
| M11      | 1.5+x,0.5-y,1-z  | 0.5-x,0.5+y,z    | -0.5+x,0.5-y,-0.5+z |
| M12      | -0.5+x,0.5-y,1-z | -0.5+x,0.5-y,1-z | -1.5+x,0.5-y,-0.5+z |
| M13      | 1.5-x,0.5+y,z    | 1-x,0.5+y,1.5-z  | 1.5-x,-0.5+y,1.5-z  |
| M14      | 0.5+x,0.5-y,1-z  | 1.5-x,0.5+y,z    | 0.5-x,-0.5+y,1.5-z  |
| M15      | -0.5+x,y,1.5-z   | -1+x,0.5-y,0.5+z | 1.5+x,0.5-y,0.5+z   |
| M16      | x,y,z            | -0.5+x,y,1.5-z   | 0.5+x,0.5-y,0.5+z   |
| M17      | 0.5+x,y,1.5-z    | 1.5-x,-y,0.5+z   | -                   |
| M18      | 1+x,y,z          | 0.5+x,y,1.5-z    | -                   |
| M19      | 0.5-x,-0.5+y,z   | 2.5-x,-y,0.5+z   | -                   |



**Table S6.** Symmetry codes of the molecules that compose the supramolecular cluster of compounds **9** and **10**.

| Molecule | Symmetry Code   |                     |
|----------|-----------------|---------------------|
|          | <b>9</b>        | <b>10</b>           |
| M1       | x,y,z           | x,y,z               |
| M2       | 2-x,0.5+y,-z    | -1+x,y,z            |
| M3       | x,1+y,z         | 1+x,y,z             |
| M4       | 2-x,-0.5+y,-z   | -1.5+x,-0.5+y,z     |
| M5       | x,-1+y,z        | -0.5+x,-0.5+y,z     |
| M6       | 2-x,0.5+y,1-z   | -1+x,1-y,-0.5+z     |
| M7       | x,y,1+z         | x,1-y,-0.5+z        |
| M8       | 2-x,-0.5+y,1-z  | 1+x,1-y,-0.5+z      |
| M9       | 1-x,0.5+y,-z    | -0.5+x,1.5-y,-0.5+z |
| M10      | -1+x,y,z        | 0.5+x,1.5-y,-0.5+z  |
| M11      | 1-x,-0.5+y,-z   | 0.5+x,0.5+y,z       |
| M12      | 1-x,0.5+y,-1-z  | 1.5+x,0.5+y,z       |
| M13      | -1+x,y,-1+z     | -0.5+x,1.5-y,0.5+z  |
| M14      | 1-x,-0.5+y,-1-z | 0.5+x,1.5-y,0.5+z   |
| M15      | x,y,-1+z        | -1+x,1-y,0.5+z      |
| M16      | 1+x,y,z         | x,1-y,0.5+z         |
| M17      | 1+x,y,1+z       | 1+x,1-y,0.5+z       |

**Table S7.** Symmetry codes of the molecules that compose the supramolecular cluster of compounds **11** and **12** dimeric nuclei.

| Dimer | Symmetry Code       |                    |                     |                   |
|-------|---------------------|--------------------|---------------------|-------------------|
|       | <b>11</b>           |                    | <b>12</b>           |                   |
| D1    | x,y,z               | 0.5-x,0.5-y,0.5-z  | x,y,z               | 0.5-x,0.5-y,0.5-z |
| D2    | 0.5-x,-0.5+y,z      | x,-y,0.5-z         | 0.5-x,-0.5+y,z      | x,-y,0.5-z        |
| D3    | x,1-y,0.5-z         | 0.5-x,0.5+y,z      | x,1-y,0.5-z         | 0.5-x,0.5+y,z     |
| D4    | 0.5+x,-y,z          | 1-x,-0.5+y,0.5-z   | 0.5+x,-y,z          | 1-x,-0.5+y,0.5-z  |
| D5    | 1-x,0.5-y,z         | 0.5+x,y,0.5-z      | 1-x,0.5-y,z         | 0.5+x,y,0.5-z     |
| D6    | 0.5+x,1-y,z         | 1-x,0.5+y,0.5-z    | 0.5+x,1-y,z         | 1-x,0.5+y,0.5-z   |
| D7    | 1-x,1.5-y,z         | 0.5+x,1+y,0.5-z    | 1-x,1.5-y,z         | 0.5+x,1+y,0.5-z   |
| D8    | 1.5-x,y,-z          | 1+x,0.5-y,-0.5+z   | 1.5-x,y,-z          | 1+x,0.5-y,-0.5+z  |
| D9    | 1-x,1-y,-z          | 0.5+x,0.5+y,-0.5+z | 0.5+x,0.5+y,-0.5+z  | 1-x,1-y,-z        |
| D10   | 0.5-x,1-y,-0.5+z    | x,0.5+y,-z         | 0.5-x,1-y,-0.5+z    | x,0.5+y,-z        |
| D11   | 0.5-x,y,-z          | x,0.5-y,-0.5+z     | x,0.5-y,-0.5+z      | 0.5-x,y,-z        |
| D12   | 0.5-x,-y,-0.5+z     | x,-0.5+y,-z        | x,-0.5+y,-z         | 0.5-x,-y,-0.5+z   |
| D13   | -x,0.5+y,0.5-z      | -0.5+x,1-y,z       | -0.5+x,1-y,z        | -x,0.5+y,0.5-z    |
| D14   | -0.5+x,y,0.5-z      | -x,0.5-y,z         | -0.5+x,y,0.5-z      | -x,0.5-y,z        |
| D15   | -x,-0.5+y,0.5-z     | -0.5+x,-y,z        | -0.5+x,-y,z         | -x,-0.5+y,0.5-z   |
| D16   | -0.5+x,-1+y,0.5-z   | -x,-0.5-y,z        | -x,-0.5-y,z         | -0.5+x,-1+y,0.5-z |
| D17   | 0.5-x,-y,0.5+z      | x,-0.5+y,1-z       | 0.5-x,-y,0.5+z      | x,-0.5+y,1-z      |
| D18   | x,0.5-y,0.5+z       | 0.5-x,y,1-z        | x,0.5-y,0.5+z       | 0.5-x,y,1-z       |
| D19   | x,0.5+y,1-z         | 0.5-x,1-y,0.5+z    | 0.5-x,1-y,0.5+z     | x,0.5+y,1-z       |
| D20   | -0.5-x,y,1-z        | -1+x,0.5-y,0.5+z   | -0.5-x,y,1-z        | -1+x,0.5-y,0.5+z  |
| D21   | -0.5+x,-0.5+y,0.5+z | -x,-y,1-z          | -0.5+x,-0.5+y,0.5+z | -x,-y,1-z         |

**Table S8.** Symmetry codes of the molecules that compose the supramolecular cluster of compound **13** dimeric nuclei.

| Dimer | Symmetry Code       |                     |
|-------|---------------------|---------------------|
|       | <b>13</b>           |                     |
| D1    | $x,y,z$             | $1-x,1-y,1-z$       |
| D2    | $1-x,2-y,1-z$       | $x,1+y,z$           |
| D3    | $1-x,-y,1-z$        | $x,-1+y,z$          |
| D4    | $1+x,y,z$           | $2-x,1-y,1-z$       |
| D5    | $2-x,-y,1-z$        | $1+x,-1+y,z$        |
| D6    | $2-x,0.5+y,1.5-z$   | $1+x,1.5-y,0.5+z$   |
| D7    | $2-x,-0.5+y,1.5-z$  | $1+x,0.5-y,0.5+z$   |
| D8    | $1-x,0.5+y,1.5-z$   | $x,1.5-y,0.5+z$     |
| D9    | $1-x,-0.5+y,1.5-z$  | $x,0.5-y,0.5+z$     |
| D10   | $-x,0.5+y,1.5-z$    | $-1+x,1.5-y,0.5+z$  |
| D11   | $-x,-0.5+y,1.5-z$   | $-1+x,0.5-y,0.5+z$  |
| D12   | $-x,2-y,1-z$        | $-1+x,1+y,z$        |
| D13   | $-x,1-y,1-z$        | $-1+x,y,z$          |
| D14   | $-1+x,1.5-y,-0.5+z$ | $-x,0.5+y,0.5-z$    |
| D15   | $-x,-0.5+y,0.5-z$   | $-1+x,0.5-y,-0.5+z$ |
| D16   | $x,1.5-y,-0.5+z$    | $1-x,0.5+y,0.5-z$   |
| D17   | $x,0.5-y,-0.5+z$    | $1-x,-0.5+y,0.5-z$  |
| D18   | $2-x,0.5+y,0.5-z$   | $1+x,1.5-y,-0.5+z$  |
| D19   | $2-x,-0.5+y,0.5-z$  | $1+x,0.5-y,-0.5+z$  |

**Table S9.** Symmetry codes of the molecules that compose the supramolecular cluster of compound **14**.

| Molecule | Symmetry Code       |
|----------|---------------------|
|          | <b>14</b>           |
| M1       | $x,y,z$             |
| M2       | $1+x,y,z$           |
| M3       | $-1+x,y,z$          |
| M4       | $2-x,-y,1-z$        |
| M5       | $1-x,-y,1-z$        |
| M6       | $1+x,0.5-y,0.5+z$   |
| M7       | $x,0.5-y,0.5+z$     |
| M8       | $2-x,0.5+y,0.5-z$   |
| M9       | $1-x,0.5+y,0.5-z$   |
| M10      | $x,0.5-y,-0.5+z$    |
| M11      | $-1+x,0.5-y,-0.5+z$ |
| M12      | $1-x,-y,-z$         |
| M13      | $-x,-y,-z$          |
| M14      | $2-x,-0.5+y,0.5-z$  |
| M15      | $1-x,-0.5+y,0.5-z$  |
| M16      | $1+x,y,z$           |
| M17      | $x,y,z$             |
| M18      | $x,0.5-y,-0.5+z$    |
| M19      | $1-x,-0.5+y,0.5-z$  |

## 5. Contact area and stabilization energy data

Observation: Hydrogen atoms are omitted for clarity. Legend for all tables: <sup>a</sup>Å<sup>2</sup>, contact area obtained by ToposPro. <sup>b</sup>kcal mol<sup>-1</sup>, interaction energy using the equation  $G_{M1...MN} = G_{M1+MN} - (G_{M1} + G_{MN})$ . <sup>c</sup>Determined using the equation  $NC_{M1...MN} = (MCN \times C_{M1...MN}) / C_{Cluster}$ . <sup>d</sup>Determined using the equation  $NG_{M1...MN} = (MCN \times G_{M1...MN}) / G_{Cluster}$ .

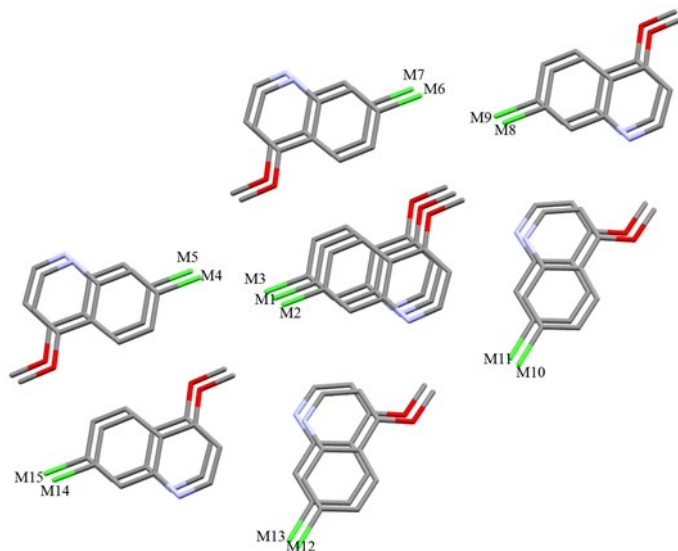

**Figure S9.** Supramolecular cluster of compound **1**.

**Table S10.** Contact area and energetic data of each dimer from the supramolecular cluster of compound **1**.

| Dimer    | $C_{M1...MN}^a$<br>(Å <sup>2</sup> ) | $G_{M1...MN}^b$<br>(kcal mol <sup>-1</sup> ) | $NC_{M1...MN}^c$ | $NG_{M1...MN}^d$ |
|----------|--------------------------------------|----------------------------------------------|------------------|------------------|
| M1...M2  | 39.34                                | -8.61                                        | 2.31             | 2.52             |
| M1...M3  | 39.34                                | -8.61                                        | 2.31             | 2.52             |
| M1...M4  | 0.52                                 | -0.08                                        | 0.03             | 0.02             |
| M1...M5  | 4.7                                  | -0.04                                        | 0.28             | 0.01             |
| M1...M6  | 31.3                                 | -4.97                                        | 1.84             | 1.46             |
| M1...M7  | 24.22                                | -3.53                                        | 1.42             | 1.03             |
| M1...M8  | 4.04                                 | -1.22                                        | 0.24             | 0.36             |
| M1...M9  | 6.61                                 | -1.37                                        | 0.39             | 0.40             |
| M1...M10 | 21.11                                | -4.34                                        | 1.24             | 1.27             |
| M1...M11 | 17.71                                | -4.04                                        | 1.04             | 1.18             |
| M1...M12 | 21.11                                | -4.34                                        | 1.24             | 1.27             |
| M1...M13 | 17.71                                | -4.04                                        | 1.04             | 1.18             |
| M1...M14 | 6.61                                 | -1.37                                        | 0.39             | 0.40             |
| M1...M15 | 4.04                                 | -1.22                                        | 0.24             | 0.36             |
| Total    | 238.36                               | -47.80                                       | 14.00            | 14.00            |

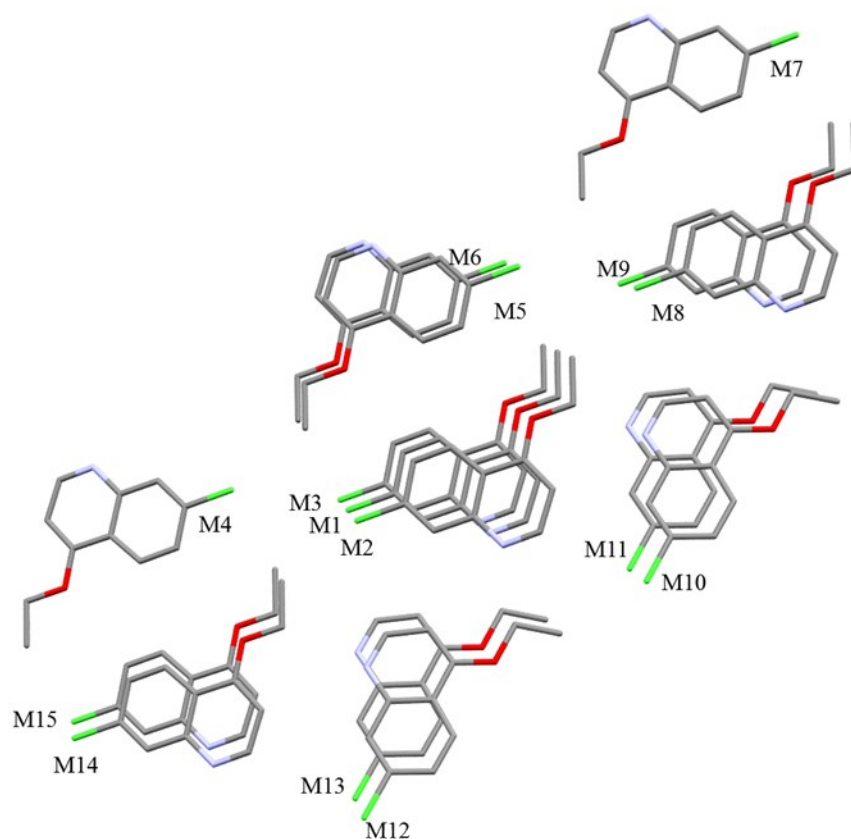

**Figure S10.** Supramolecular cluster of compound **2**.

**Table S11.** Contact area and energetic data of each dimer from the supramolecular cluster of compound **2**.

| Dimer    | $C_{M1...MN}^a$<br>( $\text{\AA}^2$ ) | $G_{M1...MN}^b$<br>( $\text{kcal mol}^{-1}$ ) | $NC_{M1...MN}^c$ | $NG_{M1...MN}^d$ |
|----------|---------------------------------------|-----------------------------------------------|------------------|------------------|
| M1...M2  | 46.36                                 | -9.38                                         | 2.42             | 2.68             |
| M1...M3  | 46.36                                 | -9.38                                         | 2.42             | 2.68             |
| M1...M4  | 2.04                                  | -0.22                                         | 0.11             | 0.06             |
| M1...M5  | 28.15                                 | -4.44                                         | 1.47             | 1.27             |
| M1...M6  | 36.98                                 | -4.08                                         | 1.93             | 1.16             |
| M1...M7  | 1.29                                  | 0.05                                          | 0.07             | -0.01            |
| M1...M8  | 5.07                                  | -1.09                                         | 0.26             | 0.31             |
| M1...M9  | 7.77                                  | -1.10                                         | 0.41             | 0.31             |
| M1...M10 | 22.06                                 | -4.16                                         | 1.15             | 1.19             |
| M1...M11 | 18.77                                 | -4.44                                         | 0.98             | 1.27             |
| M1...M12 | 22.06                                 | -4.16                                         | 1.15             | 1.19             |
| M1...M13 | 18.77                                 | -4.44                                         | 0.98             | 1.27             |
| M1...M14 | 7.77                                  | -1.10                                         | 0.41             | 0.31             |
| M1...M15 | 5.07                                  | -1.09                                         | 0.26             | 0.31             |
| Total    | 268.52                                | -49.05                                        | 14.00            | 14.00            |

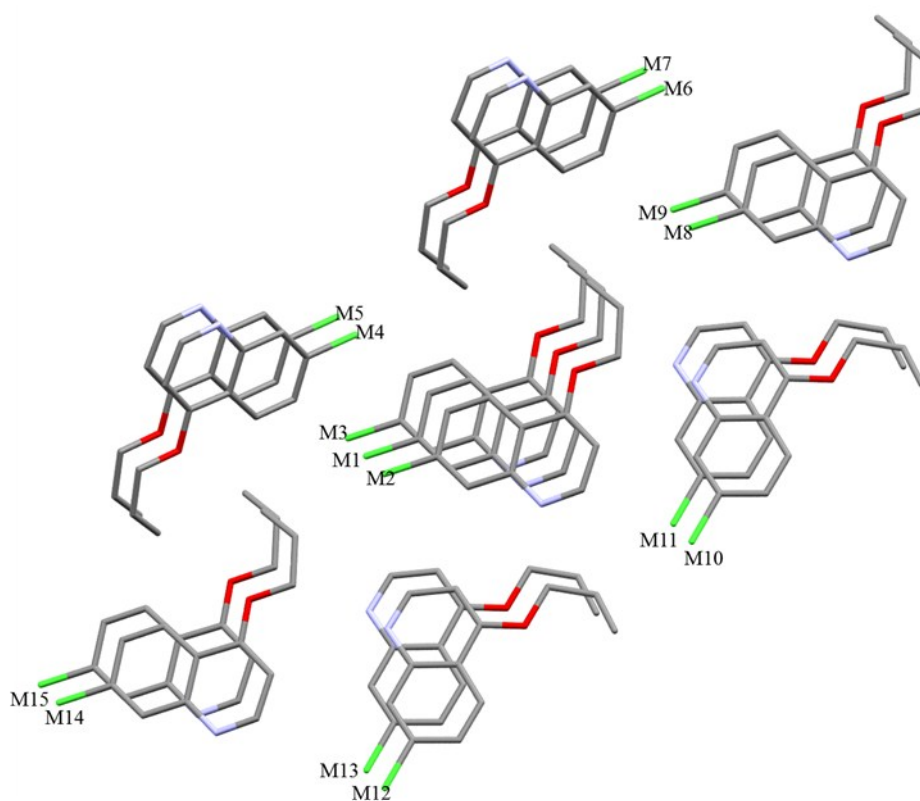

**Figure S11.** Supramolecular cluster of compound **3**.

**Table S12.** Contact area and energetic data of each dimer from the supramolecular cluster of compound **3**.

| Dimer    | $C_{M1...MN}^a$<br>( $\text{\AA}^2$ ) | $G_{M1...MN}^b$<br>( $\text{kcal mol}^{-1}$ ) | $NC_{M1...MN}^c$ | $NG_{M1...MN}^d$ |
|----------|---------------------------------------|-----------------------------------------------|------------------|------------------|
| M1...M2  | 48.01                                 | -10.59                                        | 2.46             | 2.72             |
| M1...M3  | 48.01                                 | -10.59                                        | 2.46             | 2.72             |
| M1...M4  | 11.01                                 | -1.93                                         | 0.56             | 0.50             |
| M1...M5  | 11.01                                 | -1.93                                         | 0.56             | 0.50             |
| M1...M6  | 25.24                                 | -3.23                                         | 1.29             | 0.83             |
| M1...M7  | 25.24                                 | -3.23                                         | 1.29             | 0.83             |
| M1...M8  | 3.52                                  | -1.06                                         | 0.18             | 0.27             |
| M1...M9  | 7.63                                  | -1.16                                         | 0.39             | 0.30             |
| M1...M10 | 22.12                                 | -4.55                                         | 1.13             | 1.17             |
| M1...M11 | 19.05                                 | -4.75                                         | 0.98             | 1.22             |
| M1...M12 | 22.12                                 | -4.55                                         | 1.13             | 1.17             |
| M1...M13 | 19.05                                 | -4.75                                         | 0.98             | 1.22             |
| M1...M14 | 7.63                                  | -1.16                                         | 0.39             | 0.30             |
| M1...M15 | 3.52                                  | -1.06                                         | 0.18             | 0.27             |
| Total    | 273.16                                | -54.57                                        | 14.00            | 14.00            |

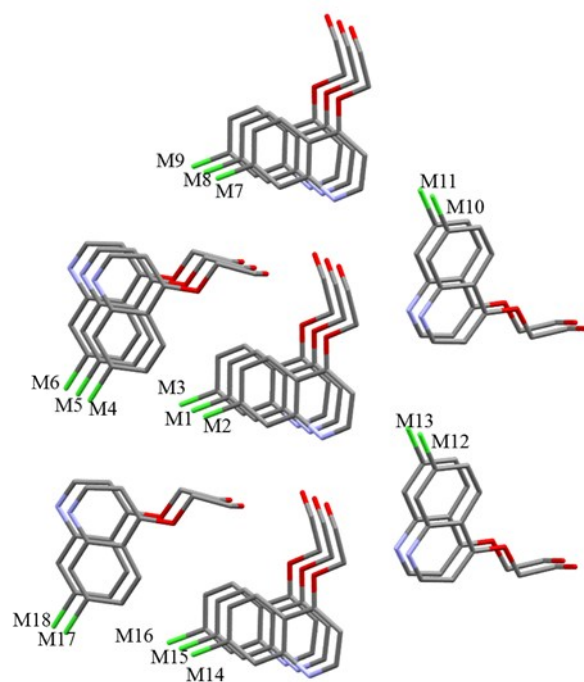

**Figure S12.** Supramolecular cluster of compound **4** considering **M1A**.

**Table S13.** Contact area and energetic data of each dimer from the supramolecular cluster of compound **4** considering **M1A**.

| Dimer    | $C_{M1...MN}^a$<br>( $\text{\AA}^2$ ) | $G_{M1...MN}^b$<br>( $\text{kcal mol}^{-1}$ ) | $NC_{M1...MN}^c$ | $NG_{M1...MN}^d$ |
|----------|---------------------------------------|-----------------------------------------------|------------------|------------------|
| M1...M2  | 47.64                                 | -11.22                                        | 2.93             | 2.90             |
| M1...M3  | 47.64                                 | -11.22                                        | 2.93             | 2.90             |
| M1...M4  | 3.29                                  | 0.24                                          | 0.20             | -0.06            |
| M1...M5  | 35.98                                 | -7.03                                         | 2.21             | 1.82             |
| M1...M6  | 22.61                                 | -2.74                                         | 1.39             | 0.71             |
| M1...M7  | 0.07                                  | -1.18                                         | 0.00             | 0.30             |
| M1...M8  | 14.03                                 | -6.24                                         | 0.86             | 1.61             |
| M1...M9  | 2.85                                  | 0.06                                          | 0.18             | -0.02            |
| M1...M10 | 19.68                                 | -4.74                                         | 1.21             | 1.22             |
| M1...M11 | 18.18                                 | -4.63                                         | 1.12             | 1.20             |
| M1...M12 | 10.85                                 | -1.94                                         | 0.67             | 0.50             |
| M1...M13 | 8.37                                  | -0.71                                         | 0.51             | 0.18             |
| M1...M14 | 2.85                                  | 0.06                                          | 0.18             | -0.02            |
| M1...M15 | 14.03                                 | -6.24                                         | 0.86             | 1.61             |
| M1...M16 | 0.07                                  | -1.18                                         | 0.00             | 0.30             |
| M1...M17 | 17.51                                 | -4.78                                         | 1.08             | 1.24             |
| M1...M18 | 10.66                                 | -2.30                                         | 0.66             | 0.59             |
| Total    | 276.31                                | -65.78                                        | 17.00            | 17.00            |

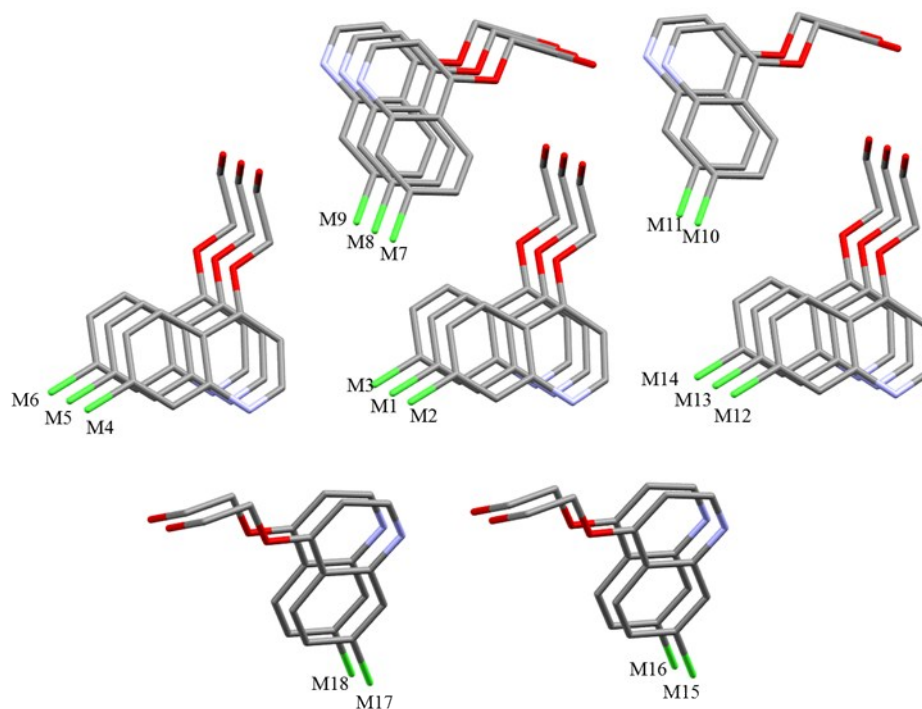

**Figure S13.** Supramolecular cluster of compound **4** considering **M1B**.

**Table S14.** Contact area and energetic data of each dimer from the supramolecular cluster of compound **4** considering **M1B**.

| Dimer    | $C_{M1...MN}^a$<br>( $\text{\AA}^2$ ) | $G_{M1...MN}^b$<br>( $\text{kcal mol}^{-1}$ ) | $NC_{M1...MN}^c$ | $NG_{M1...MN}^d$ |
|----------|---------------------------------------|-----------------------------------------------|------------------|------------------|
| M1...M2  | 49.64                                 | -8.89                                         | 3.01             | 3.14             |
| M1...M3  | 49.64                                 | -8.89                                         | 3.01             | 3.14             |
| M1...M4  | 0.6                                   | -0.27                                         | 0.04             | 0.10             |
| M1...M5  | 16.31                                 | -0.68                                         | 0.99             | 0.24             |
| M1...M6  | 0.03                                  | 0.07                                          | 0.00             | -0.03            |
| M1...M7  | 3.29                                  | 0.24                                          | 0.20             | -0.08            |
| M1...M8  | 35.98                                 | -7.03                                         | 2.18             | 2.48             |
| M1...M9  | 22.61                                 | -2.74                                         | 1.37             | 0.97             |
| M1...M10 | 17.51                                 | -4.78                                         | 1.06             | 1.69             |
| M1...M11 | 10.66                                 | -2.30                                         | 0.65             | 0.81             |
| M1...M12 | 0.03                                  | 0.07                                          | 0.00             | -0.03            |
| M1...M13 | 16.31                                 | -0.68                                         | 0.99             | 0.24             |
| M1...M14 | 0.6                                   | -0.27                                         | 0.04             | 0.10             |
| M1...M15 | 18.18                                 | -4.63                                         | 1.10             | 1.64             |
| M1...M16 | 19.68                                 | -4.74                                         | 1.19             | 1.67             |
| M1...M17 | 8.37                                  | -0.71                                         | 0.51             | 0.25             |
| M1...M18 | 10.85                                 | -1.94                                         | 0.66             | 0.69             |
| Total    | 280.29                                | -48.17                                        | 17.00            | 17.00            |

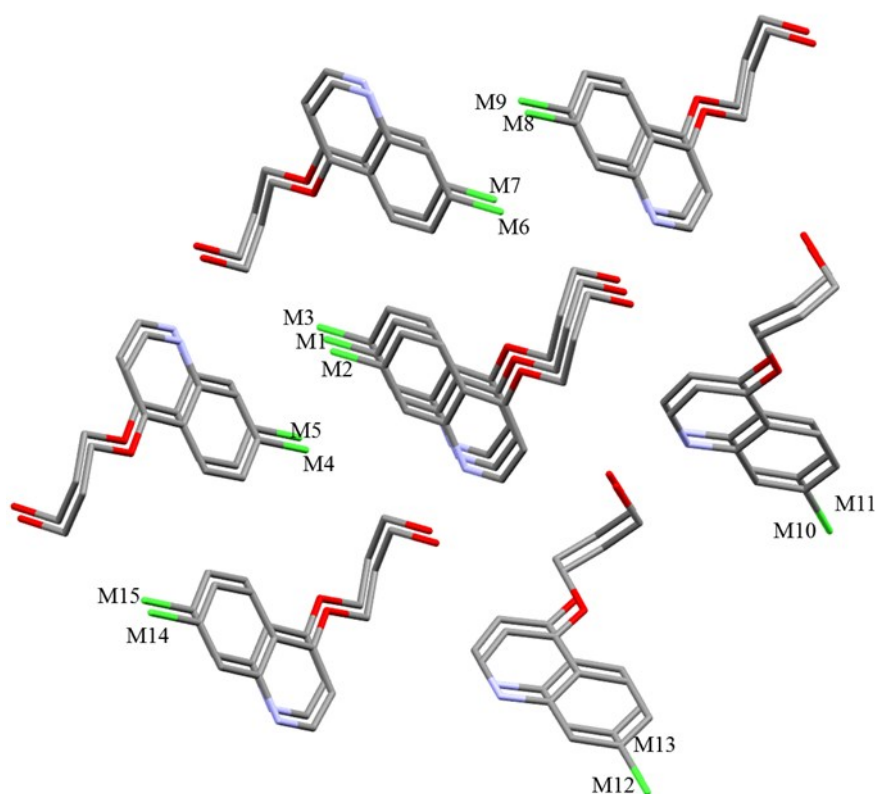

**Figure S14.** Supramolecular cluster of compound **5** considering **M1A**.

**Table S15.** Contact area and energetic data of each dimer from the supramolecular cluster of compound **5** considering **M1A**.

| Dimer    | $C_{M1\dots MN}^a$<br>( $\text{\AA}^2$ ) | $G_{M1\dots MN}^b$<br>( $\text{kcal mol}^{-1}$ ) | $NC_{M1\dots MN}^c$ | $NG_{M1\dots MN}^d$ |
|----------|------------------------------------------|--------------------------------------------------|---------------------|---------------------|
| M1...M2  | 47.84                                    | -9.17                                            | 2.26                | 2.19                |
| M1...M3  | 47.84                                    | -9.17                                            | 2.26                | 2.19                |
| M1...M4  | 11.97                                    | -0.75                                            | 0.57                | 0.18                |
| M1...M5  | 11.72                                    | -0.83                                            | 0.55                | 0.20                |
| M1...M6  | 40.64                                    | -5.46                                            | 1.92                | 1.30                |
| M1...M7  | 20.28                                    | -4.37                                            | 0.96                | 1.04                |
| M1...M8  | 11.84                                    | -3.00                                            | 0.56                | 0.72                |
| M1...M9  | 17.82                                    | -6.22                                            | 0.84                | 1.49                |
| M1...M10 | 9.63                                     | -1.29                                            | 0.46                | 0.31                |
| M1...M11 | 19.13                                    | -3.49                                            | 0.90                | 0.83                |
| M1...M12 | 22.66                                    | -3.69                                            | 1.07                | 0.88                |
| M1...M13 | 5.22                                     | -1.96                                            | 0.25                | 0.47                |
| M1...M14 | 11.84                                    | -3.00                                            | 0.56                | 0.72                |
| M1...M15 | 17.82                                    | -6.22                                            | 0.84                | 1.49                |
| Total    | 296.25                                   | -58.63                                           | 14.00               | 14.00               |



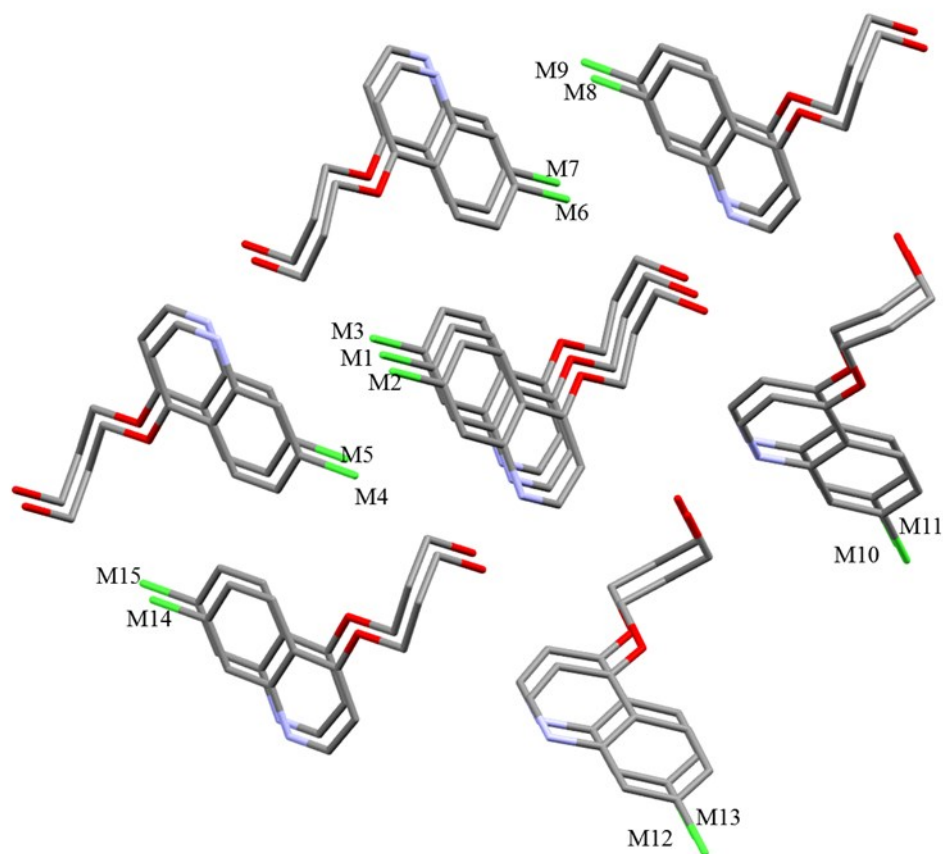

**Figure S15.** Supramolecular cluster of compound **5** considering **M1B**.

**Table S16.** Contact area and energetic data of each dimer from the supramolecular cluster of compound **5** considering **M1B**.

| Dimer    | $C_{M1...MN}^a$<br>( $\text{\AA}^2$ ) | $G_{M1...MN}^b$<br>( $\text{kcal mol}^{-1}$ ) | $NC_{M1...MN}^c$ | $NG_{M1...MN}^d$ |
|----------|---------------------------------------|-----------------------------------------------|------------------|------------------|
| M1...M2  | 48.47                                 | -9.32                                         | 2.29             | 2.22             |
| M1...M3  | 48.47                                 | -9.32                                         | 2.29             | 2.22             |
| M1...M4  | 11.97                                 | -0.75                                         | 0.57             | 0.18             |
| M1...M5  | 11.72                                 | -0.83                                         | 0.55             | 0.20             |
| M1...M6  | 20.28                                 | -4.37                                         | 0.96             | 1.04             |
| M1...M7  | 40.64                                 | -5.46                                         | 1.92             | 1.30             |
| M1...M8  | 18.08                                 | -6.17                                         | 0.85             | 1.47             |
| M1...M9  | 11.02                                 | -3.01                                         | 0.52             | 0.72             |
| M1...M10 | 5.22                                  | -1.96                                         | 0.25             | 0.47             |
| M1...M11 | 22.66                                 | -3.69                                         | 1.07             | 0.88             |
| M1...M12 | 9.63                                  | -1.29                                         | 0.45             | 0.31             |
| M1...M13 | 19.13                                 | -3.49                                         | 0.90             | 0.83             |
| M1...M14 | 18.08                                 | -6.17                                         | 0.85             | 1.47             |
| M1...M15 | 11.02                                 | -3.01                                         | 0.52             | 0.72             |
| Total    | 296.39                                | -58.84                                        | 14.00            | 14.00            |

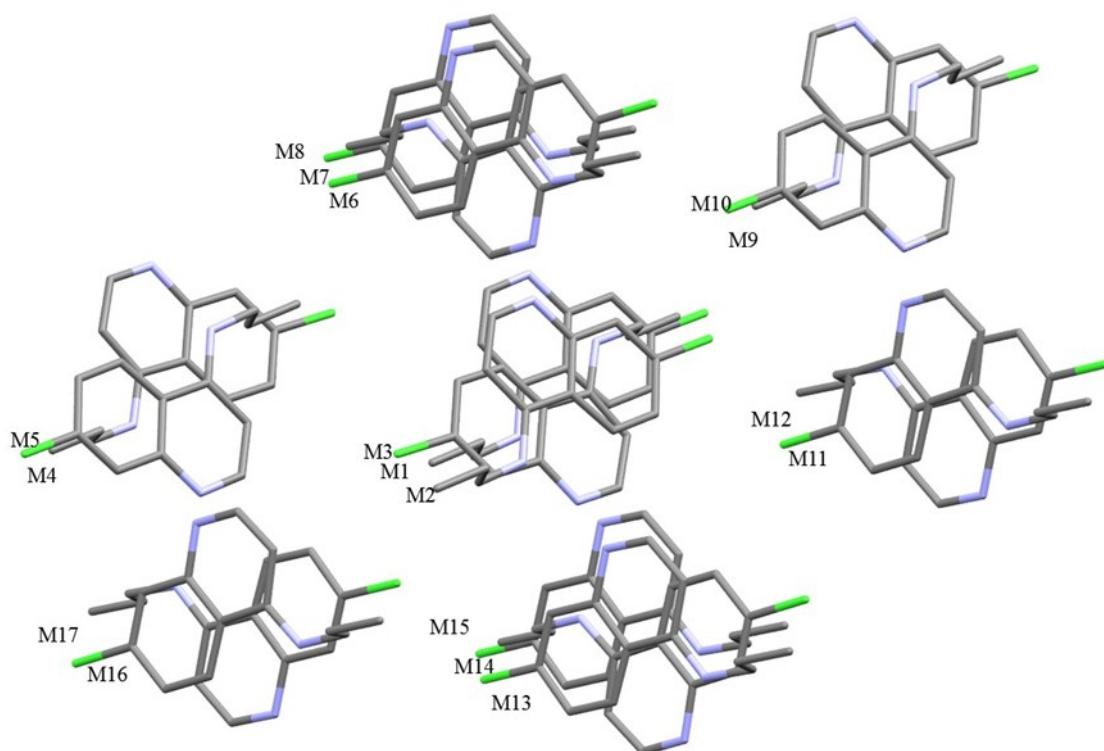

**Figure S16.** Supramolecular cluster of compound **6** considering **M1A**.

**Table S17.** Contact area and energetic data of each dimer from the supramolecular cluster of compound **6** considering **M1A**.

| Dimer    | $C_{M1...MN}^a$<br>( $\text{\AA}^2$ ) | $G_{M1...MN}^b$<br>( $\text{kcal mol}^{-1}$ ) | $NC_{M1...MN}^c$ | $NG_{M1...MN}^d$ |
|----------|---------------------------------------|-----------------------------------------------|------------------|------------------|
| M1...M2  | 56.79                                 | -14.42                                        | 3.01             | 3.69             |
| M1...M3  | 52.44                                 | -11.00                                        | 2.78             | 2.82             |
| M1...M4  | 17.48                                 | -2.90                                         | 0.93             | 0.74             |
| M1...M5  | 1.05                                  | -1.59                                         | 0.06             | 0.41             |
| M1...M6  | 12.67                                 | -2.20                                         | 0.67             | 0.56             |
| M1...M7  | 24.71                                 | -9.82                                         | 1.31             | 2.52             |
| M1...M8  | 13.26                                 | -0.42                                         | 0.70             | 0.11             |
| M1...M9  | 12.49                                 | -1.99                                         | 0.66             | 0.51             |
| M1...M10 | 8.67                                  | -0.66                                         | 0.46             | 0.17             |
| M1...M11 | 12.85                                 | -1.90                                         | 0.68             | 0.49             |
| M1...M12 | 13.63                                 | -0.69                                         | 0.72             | 0.18             |
| M1...M13 | 7.03                                  | -0.11                                         | 0.37             | 0.03             |
| M1...M14 | 24.71                                 | -9.82                                         | 1.31             | 2.52             |
| M1...M15 | 23.39                                 | -2.58                                         | 1.24             | 0.66             |
| M1...M16 | 12.85                                 | -1.90                                         | 0.68             | 0.49             |
| M1...M17 | 8.09                                  | -0.47                                         | 0.43             | 0.12             |
| Total    | 302.11                                | -62.47                                        | 16.00            | 16.00            |

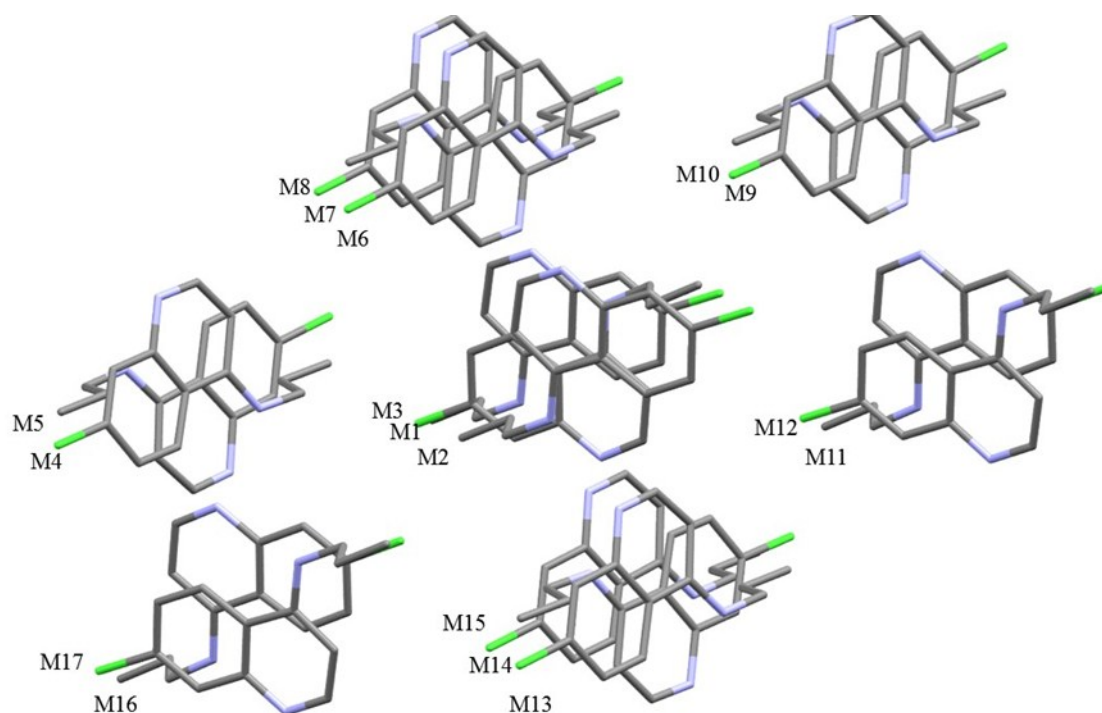

**Figure S17.** Supramolecular cluster of compound **6** considering **M1B**.

**Table S18.** Contact area and energetic data of each dimer from the supramolecular cluster of compound **6** considering **M1B**.

| Dimer    | $C_{M1...MN}^a$<br>( $\text{\AA}^2$ ) | $G_{M1...MN}^b$<br>( $\text{kcal mol}^{-1}$ ) | $NC_{M1...MN}^c$ | $NG_{M1...MN}^d$ |
|----------|---------------------------------------|-----------------------------------------------|------------------|------------------|
| M1...M2  | 52.44                                 | -11.00                                        | 2.78             | 2.91             |
| M1...M3  | 56.79                                 | -14.42                                        | 3.01             | 3.82             |
| M1...M4  | 12.67                                 | -1.76                                         | 0.67             | 0.47             |
| M1...M5  | 8.09                                  | -0.47                                         | 0.43             | 0.12             |
| M1...M6  | 13.26                                 | -0.42                                         | 0.70             | 0.11             |
| M1...M7  | 23.68                                 | -10.09                                        | 1.25             | 2.67             |
| M1...M8  | 12.67                                 | -2.20                                         | 0.67             | 0.58             |
| M1...M9  | 12.67                                 | -1.76                                         | 0.67             | 0.47             |
| M1...M10 | 13.63                                 | -0.69                                         | 0.72             | 0.18             |
| M1...M11 | 17.48                                 | -1.51                                         | 0.93             | 0.40             |
| M1...M12 | 10.38                                 | -1.29                                         | 0.55             | 0.34             |
| M1...M13 | 23.39                                 | -2.58                                         | 1.24             | 0.68             |
| M1...M14 | 23.68                                 | -10.09                                        | 1.25             | 2.67             |
| M1...M15 | 7.03                                  | -0.11                                         | 0.37             | 0.03             |
| M1...M16 | 12.49                                 | -1.99                                         | 0.66             | 0.53             |
| M1...M17 | 1.75                                  | -0.04                                         | 0.09             | 0.01             |
| Total    | 302.10                                | -60.42                                        | 16.00            | 16.00            |

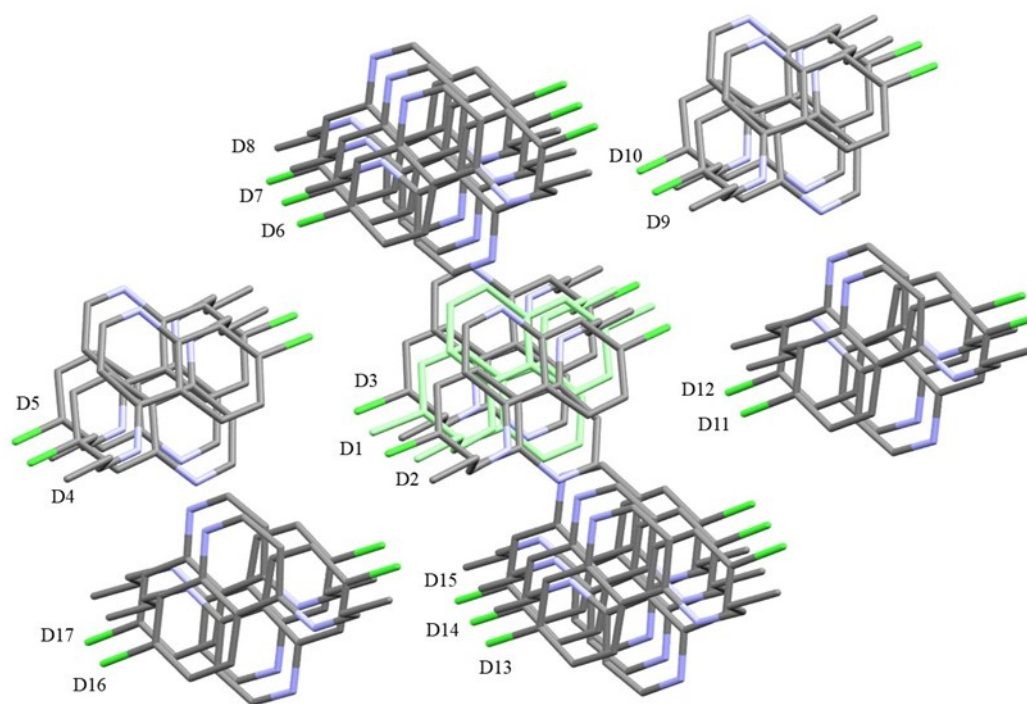

**Figure S18.** Supramolecular cluster of compound **6** considering M1A and M1B as D1. D1 dimeric nuclei was highlighted.

**Table S19.** Contact area and energetic data of each dimer from the supramolecular cluster of compound **6**.

| Dimer    | $C_{M1...MN}^a$<br>( $\text{\AA}^2$ ) | $G_{M1...MN}^b$<br>( $\text{kcal mol}^{-1}$ ) | $NC_{M1...MN}^c$ | $NG_{M1...MN}^d$ |
|----------|---------------------------------------|-----------------------------------------------|------------------|------------------|
| D1...D2  | 52.44                                 | -11.23                                        | 1.71             | 1.83             |
| D1...D3  | 52.44                                 | -11.23                                        | 1.71             | 1.83             |
| D1...D4  | 12.67                                 | -2.22                                         | 0.41             | 0.36             |
| D1...D5  | 34.57                                 | -3.09                                         | 1.13             | 0.50             |
| D1...D6  | 13.26                                 | -2.60                                         | 0.43             | 0.42             |
| D1...D7  | 68.1                                  | -22.81                                        | 2.22             | 3.71             |
| D1...D8  | 23.39                                 | -2.60                                         | 0.76             | 0.42             |
| D1...D9  | 12.67                                 | -2.22                                         | 0.41             | 0.36             |
| D1...D10 | 34.57                                 | -3.09                                         | 1.13             | 0.50             |
| D1...D11 | 45.34                                 | -4.24                                         | 1.48             | 0.69             |
| D1...D12 | 1.05                                  | -1.13                                         | 0.03             | 0.18             |
| D1...D13 | 23.39                                 | -2.60                                         | 0.76             | 0.42             |
| D1...D14 | 68.1                                  | -22.81                                        | 2.22             | 3.71             |
| D1...D15 | 13.26                                 | -1.06                                         | 0.43             | 0.17             |
| D1...D16 | 26.74                                 | -4.49                                         | 0.87             | 0.73             |
| D1...D17 | 8.67                                  | -0.83                                         | 0.28             | 0.14             |
| Total    | 490.66                                | -98.28                                        | 16.00            | 16.00            |

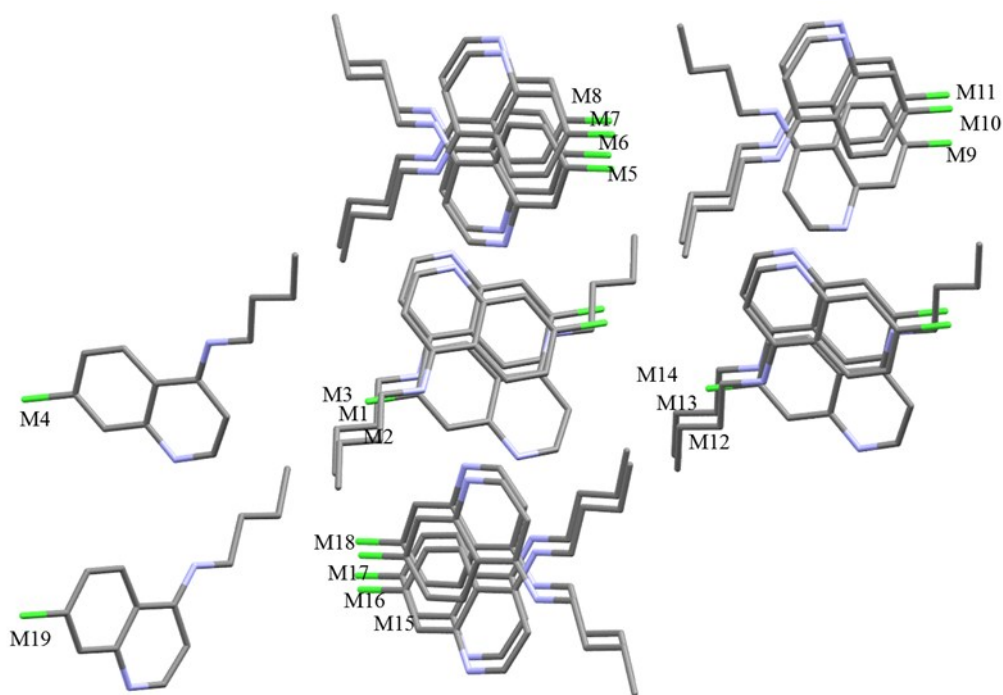

**Figure S19.** Supramolecular cluster of compound **7** considering **M1A**.

**Table S20.** Contact area and energetic data of each dimer from the supramolecular cluster of compound **7** considering **M1A**.

| Dimer    | $C_{M1...MN}^a$<br>( $\text{\AA}^2$ ) | $G_{M1...MN}^b$<br>( $\text{kcal mol}^{-1}$ ) | $NC_{M1...MN}^c$ | $NG_{M1...MN}^d$ |
|----------|---------------------------------------|-----------------------------------------------|------------------|------------------|
| M1...M2  | 41.61                                 | -11.17                                        | 2.32             | 3.15             |
| M1...M3  | 52.74                                 | -11.81                                        | 2.94             | 3.33             |
| M1...M4  | 10.92                                 | -1.90                                         | 0.61             | 0.54             |
| M1...M5  | 14                                    | -1.85                                         | 0.78             | 0.52             |
| M1...M6  | 26.04                                 | -9.69                                         | 1.45             | 2.73             |
| M1...M7  | 18.06                                 | -2.22                                         | 1.01             | 0.62             |
| M1...M8  | 7.47                                  | -0.89                                         | 0.42             | 0.25             |
| M1...M9  | 21.25                                 | -1.84                                         | 1.19             | 0.52             |
| M1...M10 | 5.82                                  | -0.23                                         | 0.32             | 0.06             |
| M1...M11 | 4.47                                  | -0.28                                         | 0.25             | 0.08             |
| M1...M12 | 19.34                                 | -2.19                                         | 1.08             | 0.62             |
| M1...M13 | 10.92                                 | -1.90                                         | 0.61             | 0.54             |
| M1...M14 | 19.34                                 | -2.19                                         | 1.08             | 0.62             |
| M1...M15 | 11.7                                  | -1.09                                         | 0.65             | 0.31             |
| M1...M16 | 24.45                                 | -9.47                                         | 1.36             | 2.67             |
| M1...M17 | 19.31                                 | -3.41                                         | 1.08             | 0.96             |
| M1...M18 | 9.37                                  | -1.07                                         | 0.52             | 0.30             |
| M1...M19 | 5.78                                  | -0.67                                         | 0.32             | 0.19             |
| Total    | 322.59                                | -63.87                                        | 18.00            | 18.00            |

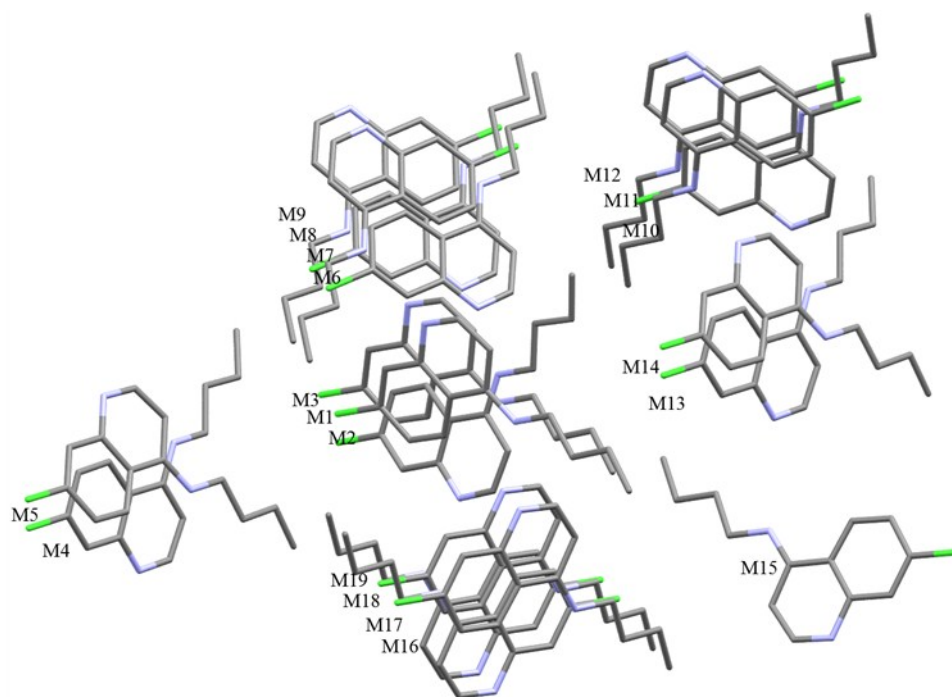

**Figure S20.** Supramolecular cluster of compound **7** considering **M1B**.

**Table S21.** Contact area and energetic data of each dimer from the supramolecular cluster of compound **7** considering **M1B**.

| Dimer    | $C_{M1...MN}^a$<br>(Å <sup>2</sup> ) | $G_{M1...MN}^b$<br>(kcal mol <sup>-1</sup> ) | $NC_{M1...MN}^c$ | $NG_{M1...MN}^d$ |
|----------|--------------------------------------|----------------------------------------------|------------------|------------------|
| M1...M2  | 52.51                                | -12.29                                       | 2.97             | 3.42             |
| M1...M3  | 52.51                                | -12.29                                       | 2.97             | 3.42             |
| M1...M4  | 14.79                                | -2.43                                        | 0.84             | 0.68             |
| M1...M5  | 7.83                                 | -1.27                                        | 0.44             | 0.35             |
| M1...M6  | 9.37                                 | -1.07                                        | 0.53             | 0.30             |
| M1...M7  | 14                                   | -1.85                                        | 0.79             | 0.51             |
| M1...M8  | 24.45                                | -9.47                                        | 1.38             | 2.64             |
| M1...M9  | 18.06                                | -2.22                                        | 1.02             | 0.62             |
| M1...M10 | 4.47                                 | -0.28                                        | 0.25             | 0.08             |
| M1...M11 | 5.78                                 | -0.67                                        | 0.33             | 0.19             |
| M1...M12 | 21.25                                | -1.84                                        | 1.20             | 0.51             |
| M1...M13 | 14.79                                | -2.43                                        | 0.84             | 0.68             |
| M1...M14 | 7.83                                 | -1.27                                        | 0.44             | 0.35             |
| M1...M15 | 5.82                                 | -0.23                                        | 0.33             | 0.06             |
| M1...M16 | 19.31                                | -3.41                                        | 1.09             | 0.95             |
| M1...M17 | 26.04                                | -9.69                                        | 1.47             | 2.70             |
| M1...M18 | 11.7                                 | -1.09                                        | 0.66             | 0.30             |
| M1...M19 | 7.47                                 | -0.89                                        | 0.42             | 0.25             |
| Total    | 317.98                               | -64.69                                       | 18.00            | 18.00            |

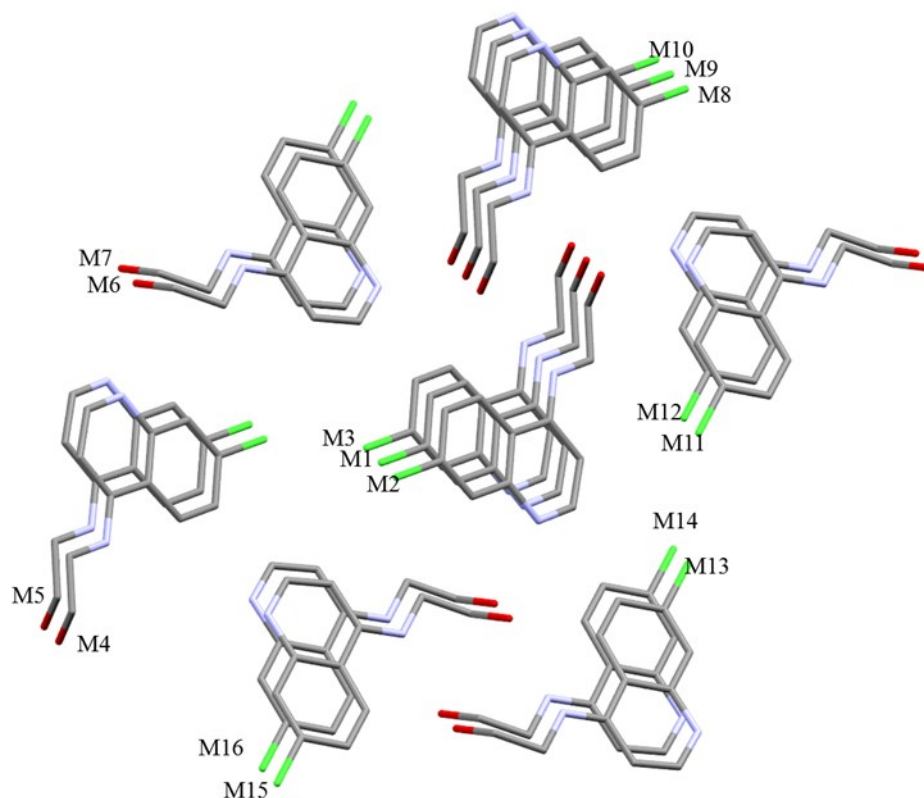

**Figure S21.** Supramolecular cluster of compound **8**.

**Table S22.** Contact area and energetic data of each dimer from the supramolecular cluster of compound **8**.

| Dimer    | $C_{M1...MN}^a$<br>( $\text{\AA}^2$ ) | $G_{M1...MN}^b$<br>( $\text{kcal mol}^{-1}$ ) | $NC_{M1...MN}^c$ | $NG_{M1...MN}^d$ |
|----------|---------------------------------------|-----------------------------------------------|------------------|------------------|
| M1...M2  | 44.75                                 | -9.19                                         | 2.43             | 2.13             |
| M1...M3  | 44.75                                 | -9.19                                         | 2.43             | 2.13             |
| M1...M4  | 0.99                                  | 0.01                                          | 0.05             | 0.00             |
| M1...M5  | 8.03                                  | -0.11                                         | 0.44             | 0.03             |
| M1...M6  | 13.27                                 | -3.12                                         | 0.72             | 0.72             |
| M1...M7  | 11.36                                 | -3.10                                         | 0.62             | 0.72             |
| M1...M8  | 9.41                                  | -1.10                                         | 0.51             | 0.25             |
| M1...M9  | 28.99                                 | -9.41                                         | 1.57             | 2.18             |
| M1...M10 | 5.08                                  | -0.20                                         | 0.28             | 0.05             |
| M1...M11 | 23.32                                 | -8.15                                         | 1.26             | 1.88             |
| M1...M12 | 19.44                                 | -3.45                                         | 1.05             | 0.80             |
| M1...M13 | 13.27                                 | -3.12                                         | 0.72             | 0.72             |
| M1...M14 | 11.36                                 | -3.10                                         | 0.62             | 0.72             |
| M1...M15 | 19.44                                 | -3.45                                         | 1.05             | 0.80             |
| M1...M16 | 23.32                                 | -8.15                                         | 1.26             | 1.88             |
| Total    | 276.78                                | -64.82                                        | 15.00            | 15.00            |

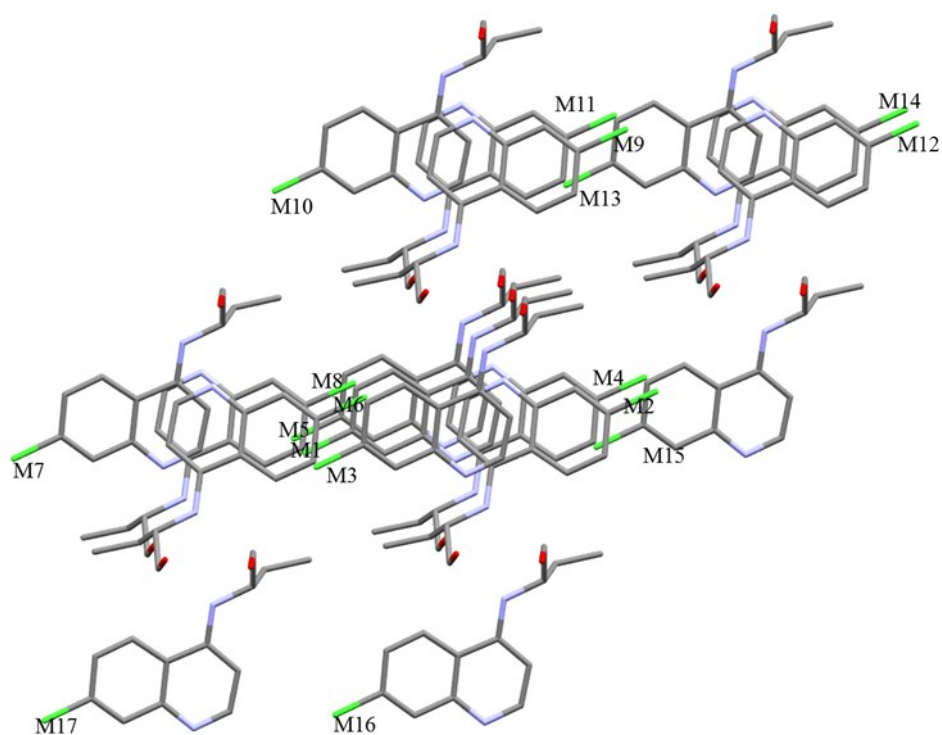

**Figure S22.** Supramolecular cluster of compound **9**.

**Table S23.** Contact area and energetic data of each dimer from the supramolecular cluster of compound **9**.

| Dimer    | $C_{M1...MN}^a$<br>( $\text{\AA}^2$ ) | $G_{M1...MN}^b$<br>( $\text{kcal mol}^{-1}$ ) | $NC_{M1...MN}^c$ | $NG_{M1...MN}^d$ |
|----------|---------------------------------------|-----------------------------------------------|------------------|------------------|
| M1...M2  | 49.51                                 | -16.54                                        | 2.54             | 3.52             |
| M1...M3  | 4.85                                  | -1.46                                         | 0.25             | 0.31             |
| M1...M4  | 49.51                                 | -16.54                                        | 2.54             | 3.52             |
| M1...M5  | 4.85                                  | -1.46                                         | 0.25             | 0.31             |
| M1...M6  | 16.81                                 | -3.29                                         | 0.86             | 0.70             |
| M1...M7  | 20.05                                 | -1.60                                         | 1.03             | 0.34             |
| M1...M8  | 16.81                                 | -3.29                                         | 0.86             | 0.70             |
| M1...M9  | 34.38                                 | -9.40                                         | 1.76             | 2.00             |
| M1...M10 | 8.47                                  | -2.64                                         | 0.43             | 0.56             |
| M1...M11 | 34.38                                 | -9.40                                         | 1.76             | 2.00             |
| M1...M12 | 10.25                                 | -0.82                                         | 0.53             | 0.17             |
| M1...M13 | 11.53                                 | -1.85                                         | 0.59             | 0.39             |
| M1...M14 | 10.25                                 | -0.82                                         | 0.53             | 0.17             |
| M1...M15 | 20.05                                 | -1.60                                         | 1.03             | 0.34             |
| M1...M16 | 8.47                                  | -2.64                                         | 0.43             | 0.56             |
| M1...M17 | 11.53                                 | -1.85                                         | 0.59             | 0.39             |
| Total    | 311.7                                 | -75.19                                        | 16.00            | 16.00            |



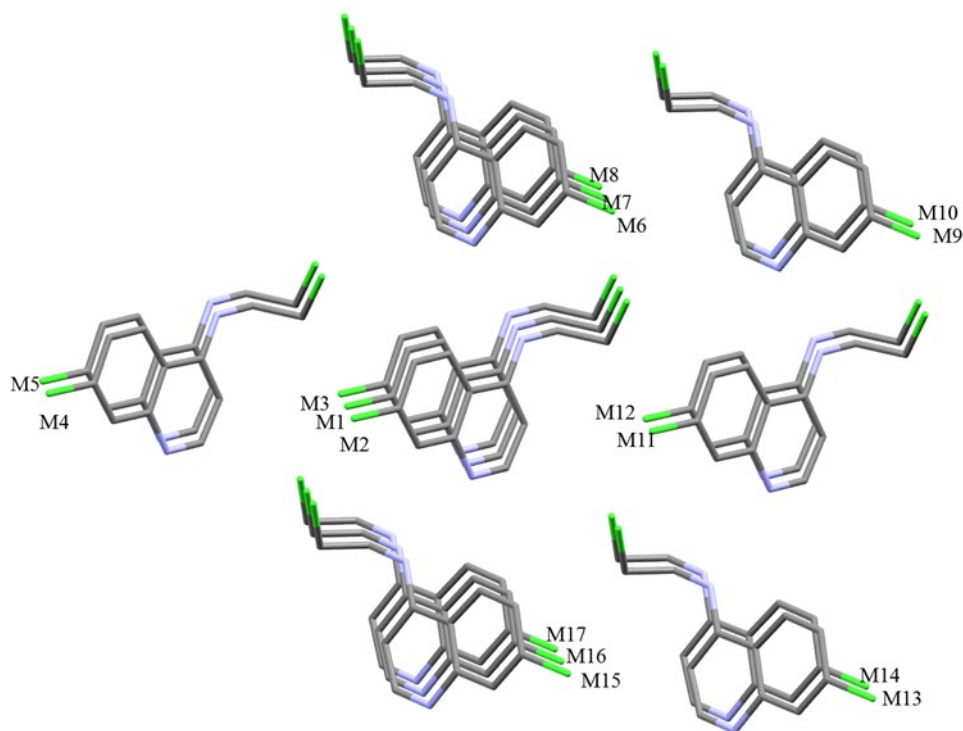

**Figure S23.** Supramolecular cluster of compound **10**.

**Table S24.** Contact area and energetic data of each dimer from the supramolecular cluster of compound **10**.

| Dimer    | $C_{M1...MN}^a$<br>( $\text{\AA}^2$ ) | $G_{M1...MN}^b$<br>( $\text{kcal mol}^{-1}$ ) | $NC_{M1...MN}^c$ | $NG_{M1...MN}^d$ |
|----------|---------------------------------------|-----------------------------------------------|------------------|------------------|
| M1...M2  | 49.93                                 | -10.82                                        | 2.80             | 2.95             |
| M1...M3  | 49.93                                 | -10.82                                        | 2.80             | 2.95             |
| M1...M4  | 13.08                                 | -1.66                                         | 0.73             | 0.45             |
| M1...M5  | 18.68                                 | -3.15                                         | 1.05             | 0.86             |
| M1...M6  | 10.91                                 | -0.78                                         | 0.61             | 0.21             |
| M1...M7  | 25.61                                 | -9.79                                         | 1.43             | 2.67             |
| M1...M8  | 13.82                                 | -2.10                                         | 0.77             | 0.57             |
| M1...M9  | 9.06                                  | -0.95                                         | 0.51             | 0.26             |
| M1...M10 | 1.73                                  | -0.10                                         | 0.10             | 0.03             |
| M1...M11 | 18.68                                 | -3.15                                         | 1.05             | 0.86             |
| M1...M12 | 13.08                                 | -1.66                                         | 0.73             | 0.45             |
| M1...M13 | 1.73                                  | -0.10                                         | 0.10             | 0.03             |
| M1...M14 | 9.06                                  | -0.95                                         | 0.51             | 0.26             |
| M1...M15 | 13.82                                 | -2.10                                         | 0.77             | 0.57             |
| M1...M16 | 25.61                                 | -9.79                                         | 1.43             | 2.67             |
| M1...M17 | 10.91                                 | -0.78                                         | 0.61             | 0.21             |
| Total    | 285.64                                | -58.67                                        | 16.00            | 16.00            |

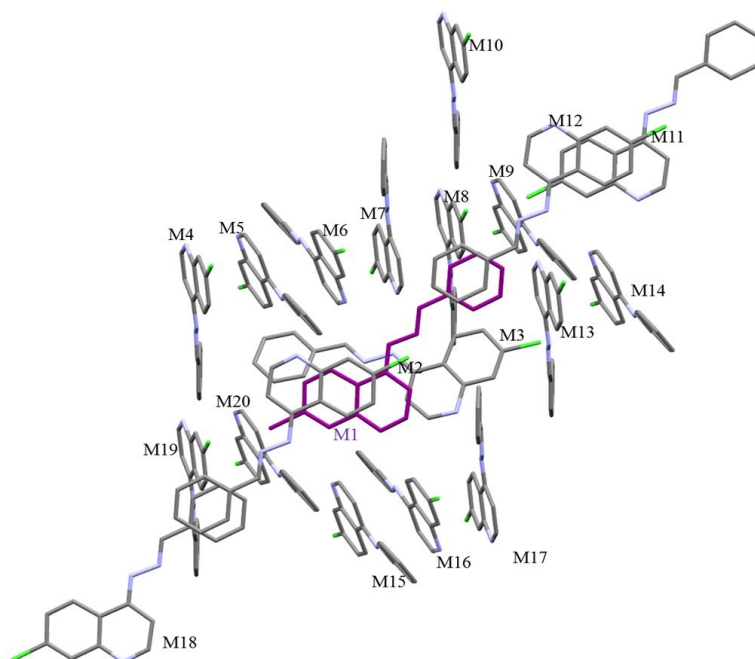

**Figure S24.** Supramolecular cluster of compound **11**.

**Table S25.** Contact area and energetic data of each dimer from the supramolecular cluster of compound **11**.

| Dimer    | $C_{M1\dots MN}^a$<br>( $\text{\AA}^2$ ) | $G_{M1\dots MN}^b$<br>( $\text{kcal mol}^{-1}$ ) | $NC_{M1\dots MN}^c$ | $NG_{M1\dots MN}^d$ |
|----------|------------------------------------------|--------------------------------------------------|---------------------|---------------------|
| M1...M2  | 50.94                                    | -14.77                                           | 2.71                | 3.82                |
| M1...M3  | 60.67                                    | -12.22                                           | 3.23                | 3.16                |
| M1...M4  | 9.45                                     | -1.68                                            | 0.50                | 0.44                |
| M1...M5  | 12.95                                    | -1.26                                            | 0.69                | 0.33                |
| M1...M6  | 24.8                                     | -10.98                                           | 1.32                | 2.84                |
| M1...M7  | 26.29                                    | -3.12                                            | 1.40                | 0.81                |
| M1...M8  | 9.45                                     | -1.68                                            | 0.50                | 0.44                |
| M1...M9  | 12.67                                    | -0.92                                            | 0.68                | 0.24                |
| M1...M10 | 9.58                                     | -0.34                                            | 0.51                | 0.09                |
| M1...M11 | 38.41                                    | -5.80                                            | 2.05                | 1.50                |
| M1...M12 | 9.76                                     | -0.97                                            | 0.52                | 0.25                |
| M1...M13 | 7.8                                      | -1.23                                            | 0.42                | 0.32                |
| M1...M14 | 8.09                                     | -1.41                                            | 0.43                | 0.36                |
| M1...M15 | 6                                        | -0.38                                            | 0.32                | 0.10                |
| M1...M16 | 24.80                                    | -10.98                                           | 1.32                | 2.84                |
| M1...M17 | 26.29                                    | -3.12                                            | 1.40                | 0.81                |
| M1...M18 | 9.76                                     | -0.97                                            | 0.52                | 0.25                |
| M1...M19 | 0.82                                     | -0.21                                            | 0.04                | 0.06                |
| M1...M20 | 8.09                                     | -1.41                                            | 0.43                | 0.36                |
| Total    | 356.62                                   | -73.44                                           | 19.00               | 19.00               |

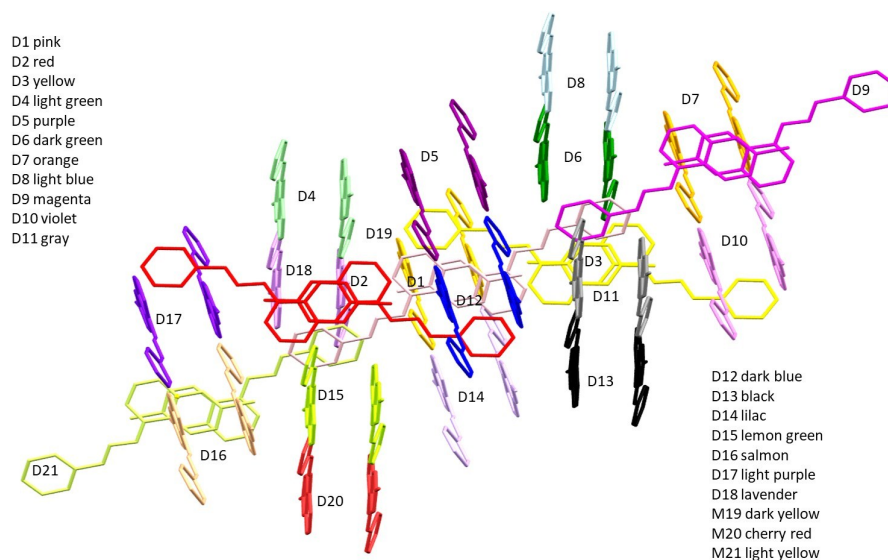

**Figure S25.** Supramolecular cluster of compound **11**. Dimer considered as the initial nucleus. Color were used for clarity.

**Table S26.** Contact area and energetic data of each dimer from the supramolecular cluster of compound **11**.

| Dimer    | $C_{M1...MN}^a$<br>( $\text{\AA}^2$ ) | $G_{M1...MN}^b$<br>( $\text{kcal mol}^{-1}$ ) | $NC_{M1...MN}^c$ | $NG_{M1...MN}^d$ |
|----------|---------------------------------------|-----------------------------------------------|------------------|------------------|
| D1...D2  | 60.67                                 | -12.93                                        | 1.98             | 2.19             |
| D1...D3  | 60.67                                 | -12.93                                        | 1.98             | 2.19             |
| D1...D4  | 35.74                                 | -4.61                                         | 1.17             | 0.78             |
| D1...D5  | 68.55                                 | -24.75                                        | 2.24             | 4.20             |
| D1...D6  | 35.74                                 | -4.61                                         | 1.17             | 0.78             |
| D1...D7  | 12.67                                 | -0.88                                         | 0.41             | 0.15             |
| D1...D8  | 9.58                                  | -0.04                                         | 0.31             | 0.01             |
| D1...D9  | 57.94                                 | -7.54                                         | 1.90             | 1.28             |
| D1...D10 | 8.09                                  | -1.17                                         | 0.26             | 0.20             |
| D1...D11 | 8.62                                  | -1.28                                         | 0.28             | 0.22             |
| D1...D12 | 8.09                                  | -1.17                                         | 0.26             | 0.20             |
| D1...D13 | 35.74                                 | -4.61                                         | 1.17             | 0.78             |
| D1...D14 | 68.55                                 | -24.75                                        | 2.24             | 4.20             |
| D1...D15 | 35.74                                 | -4.61                                         | 1.17             | 0.78             |
| D1...D16 | 12.67                                 | -0.88                                         | 0.41             | 0.15             |
| D1...D17 | 8.09                                  | -1.17                                         | 0.26             | 0.20             |
| D1...D18 | 8.62                                  | -1.28                                         | 0.28             | 0.22             |
| D1...D19 | 8.09                                  | -1.17                                         | 0.26             | 0.20             |
| D1...D20 | 9.58                                  | -0.04                                         | 0.31             | 0.01             |
| D1...D21 | 57.94                                 | -7.54                                         | 1.90             | 1.28             |
| Total    | 611.38                                | -117.93                                       | 20.00            | 20.00            |

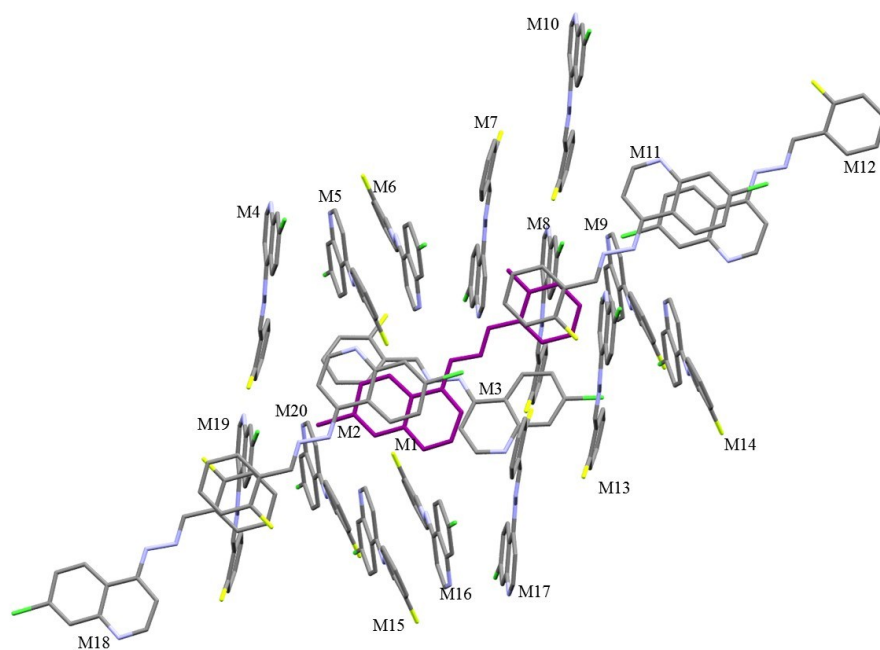

**Figure S26.** Supramolecular cluster of compound **12**.

**Table S27.** Contact area and energetic data of each dimer from the supramolecular cluster of compound **12**.

| Dimer    | $C_{M1...MN}^a$<br>( $\text{\AA}^2$ ) | $G_{M1...MN}^b$<br>( $\text{kcal mol}^{-1}$ ) | $NC_{M1...MN}^c$ | $NG_{M1...MN}^d$ |
|----------|---------------------------------------|-----------------------------------------------|------------------|------------------|
| M1...M2  | 51.55                                 | -14.71                                        | 2.73             | 3.76             |
| M1...M3  | 59.95                                 | -12.69                                        | 3.17             | 3.24             |
| M1...M4  | 9.67                                  | -1.55                                         | 0.51             | 0.40             |
| M1...M5  | 12.92                                 | -1.16                                         | 0.68             | 0.30             |
| M1...M6  | 24.99                                 | -11.17                                        | 1.32             | 2.85             |
| M1...M7  | 27.19                                 | -3.11                                         | 1.44             | 0.80             |
| M1...M8  | 9.67                                  | -1.55                                         | 0.51             | 0.40             |
| M1...M9  | 13.14                                 | -0.82                                         | 0.70             | 0.21             |
| M1...M10 | 10.42                                 | -0.63                                         | 0.55             | 0.16             |
| M1...M11 | 39.19                                 | -5.90                                         | 2.07             | 1.51             |
| M1...M12 | 9.85                                  | -1.15                                         | 0.52             | 0.29             |
| M1...M13 | 6.21                                  | -0.87                                         | 0.33             | 0.22             |
| M1...M14 | 7.74                                  | -1.50                                         | 0.41             | 0.38             |
| M1...M15 | 5.96                                  | -0.46                                         | 0.32             | 0.12             |
| M1...M16 | 24.99                                 | -11.17                                        | 1.32             | 2.85             |
| M1...M17 | 27.19                                 | -3.11                                         | 1.44             | 0.80             |
| M1...M18 | 9.85                                  | -1.15                                         | 0.52             | 0.29             |
| M1...M19 | 0.68                                  | -0.15                                         | 0.04             | 0.04             |
| M1...M20 | 7.74                                  | -1.50                                         | 0.41             | 0.38             |
| Total    | 358.9                                 | -74.34                                        | 19.00            | 19.00            |

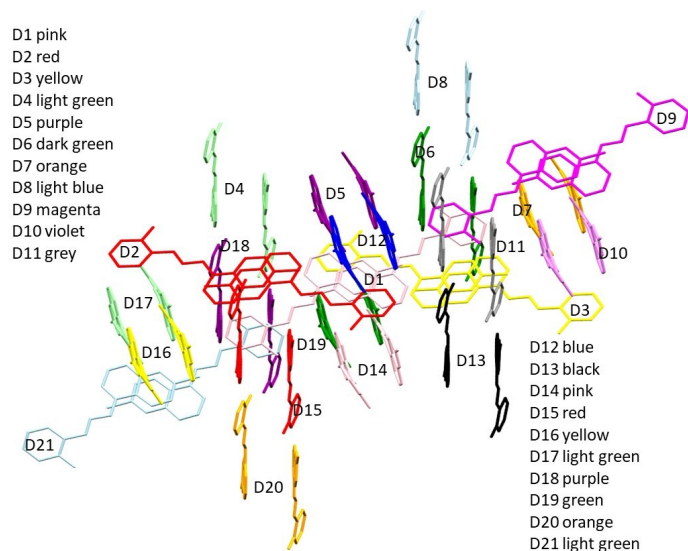

**Figure S27.** Supramolecular cluster of compound **12**. Dimer considered as the initial nucleus. Color were used for clarity.

**Table S28.** Contact area and energetic data of each dimer from the supramolecular cluster of compound **12**.

| Dimer    | $C_{M1...MN}^a$<br>( $\text{\AA}^2$ ) | $G_{M1...MN}^b$<br>( $\text{kcal mol}^{-1}$ ) | $NC_{M1...MN}^c$ | $NG_{M1...MN}^d$ |
|----------|---------------------------------------|-----------------------------------------------|------------------|------------------|
| D1...D2  | 59.95                                 | -13.69                                        | 1.95             | 2.22             |
| D1...D3  | 59.95                                 | -13.69                                        | 1.95             | 2.22             |
| D1...D4  | 36.86                                 | -4.87                                         | 1.20             | 0.79             |
| D1...D5  | 68.85                                 | -24.83                                        | 2.24             | 4.03             |
| D1...D6  | 36.86                                 | -4.87                                         | 1.20             | 0.79             |
| D1...D7  | 13.14                                 | -0.87                                         | 0.43             | 0.14             |
| D1...D8  | 10.42                                 | -0.28                                         | 0.34             | 0.05             |
| D1...D9  | 58.88                                 | -8.09                                         | 1.92             | 1.31             |
| D1...D10 | 7.74                                  | -1.46                                         | 0.25             | 0.24             |
| D1...D11 | 6.89                                  | -1.17                                         | 0.22             | 0.19             |
| D1...D12 | 7.74                                  | -1.46                                         | 0.25             | 0.24             |
| D1...D13 | 36.86                                 | -4.87                                         | 1.20             | 0.79             |
| D1...D14 | 68.85                                 | -24.83                                        | 2.24             | 4.03             |
| D1...D15 | 36.86                                 | -4.87                                         | 1.20             | 0.79             |
| D1...D16 | 13.14                                 | -0.87                                         | 0.43             | 0.14             |
| D1...D17 | 7.74                                  | -1.46                                         | 0.25             | 0.24             |
| D1...D18 | 6.89                                  | -1.17                                         | 0.22             | 0.19             |
| D1...D19 | 7.74                                  | -1.46                                         | 0.25             | 0.24             |
| D1...D20 | 10.42                                 | -0.28                                         | 0.34             | 0.05             |
| D1...D21 | 58.88                                 | -8.09                                         | 1.92             | 1.31             |
| Total    | 614.66                                | -123.20                                       | 20.00            | 20.00            |

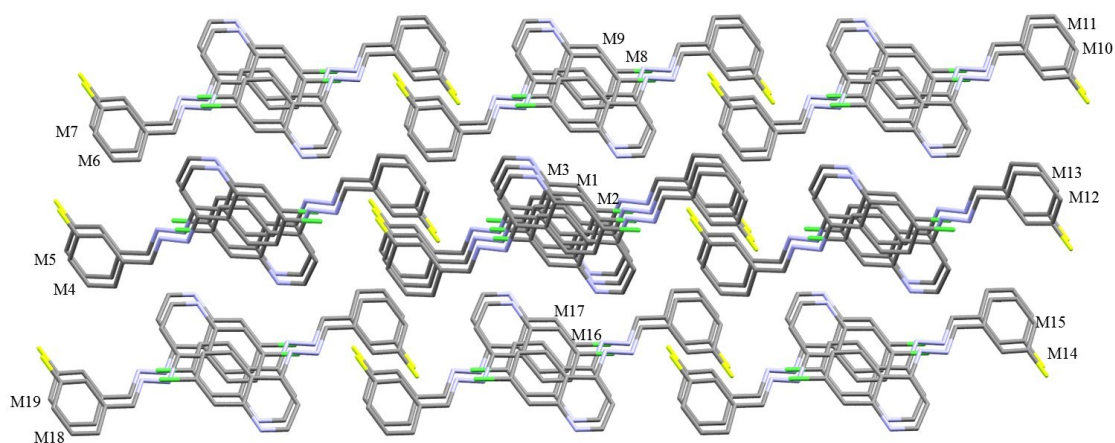

**Figure S28.** Supramolecular cluster of compound **13**. Dimer considered as the initial nucleus.

**Table S29.** Contact area and energetic data of each dimer from the supramolecular cluster of compound **13**.

| Dimer    | $C_{M1...MN}^a$<br>( $\text{\AA}^2$ ) | $G_{M1...MN}^b$<br>( $\text{kcal mol}^{-1}$ ) | $NC_{M1...MN}^c$ | $NG_{M1...MN}^d$ |
|----------|---------------------------------------|-----------------------------------------------|------------------|------------------|
| D1...D2  | 34.83                                 | -10.04                                        | 1.03             | 1.40             |
| D1...D3  | 34.83                                 | -10.04                                        | 1.03             | 1.40             |
| D1...D4  | 35.12                                 | -6.95                                         | 1.04             | 0.97             |
| D1...D5  | 39.18                                 | -3.58                                         | 1.16             | 0.50             |
| D1...D6  | 7.12                                  | -1.31                                         | 0.21             | 0.18             |
| D1...D7  | 7.12                                  | -1.31                                         | 0.21             | 0.18             |
| D1...D8  | 74.25                                 | -17.14                                        | 2.20             | 2.40             |
| D1...D9  | 74.25                                 | -17.14                                        | 2.20             | 2.40             |
| D1...D10 | 16.26                                 | -3.44                                         | 0.48             | 0.48             |
| D1...D11 | 16.26                                 | -3.44                                         | 0.48             | 0.48             |
| D1...D12 | 39.18                                 | -3.58                                         | 1.16             | 0.50             |
| D1...D13 | 35.12                                 | -6.95                                         | 1.04             | 0.97             |
| D1...D14 | 7.12                                  | -1.31                                         | 0.21             | 0.18             |
| D1...D15 | 7.12                                  | -1.31                                         | 0.21             | 0.18             |
| D1...D16 | 74.25                                 | -17.14                                        | 2.20             | 2.40             |
| D1...D17 | 74.25                                 | -17.14                                        | 2.20             | 2.40             |
| D1...D18 | 16.26                                 | -3.44                                         | 0.48             | 0.48             |
| D1...D19 | 16.26                                 | -3.44                                         | 0.48             | 0.48             |
| Total    | 608.78                                | -128.69                                       | 18.00            | 18.00            |

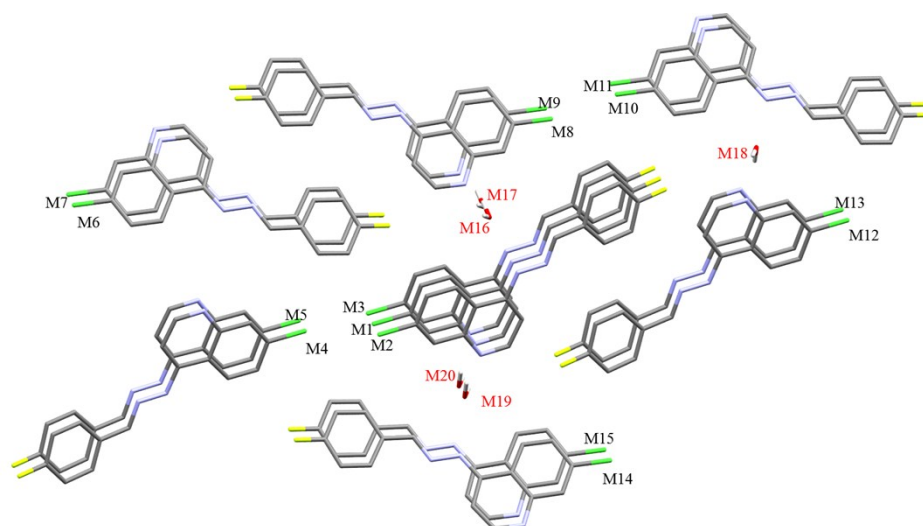

**Figure S29.** Supramolecular cluster of compound **14**. Dimer considered as the initial nucleus.

**Table S30.** Contact area and energetic data of each dimer from the supramolecular cluster of compound **14**.

| Dimer    | $C_{M1...MN}^a$<br>( $\text{\AA}^2$ ) | $G_{M1...MN}^b$<br>( $\text{kcal mol}^{-1}$ ) | $NC_{M1...MN}^c$ | $NG_{M1...MN}^d$ |
|----------|---------------------------------------|-----------------------------------------------|------------------|------------------|
| M1...M2  | 67.54                                 | -15.22                                        | 3.58             | 3.83             |
| M1...M3  | 67.54                                 | -15.22                                        | 3.58             | 3.83             |
| M1...M4  | 6.24                                  | -0.03                                         | 0.33             | 0.01             |
| M1...M5  | 2.02                                  | -0.22                                         | 0.11             | 0.06             |
| M1...M6  | 12.51                                 | -1.99                                         | 0.66             | 0.50             |
| M1...M7  | 11.89                                 | -2.22                                         | 0.63             | 0.56             |
| M1...M8  | 7.28                                  | -2.92                                         | 0.39             | 0.74             |
| M1...M9  | 17.9                                  | -4.54                                         | 0.95             | 1.14             |
| M1...M10 | 11.89                                 | -2.22                                         | 0.63             | 0.56             |
| M1...M11 | 12.51                                 | -1.99                                         | 0.66             | 0.50             |
| M1...M12 | 37.83                                 | -4.91                                         | 2.00             | 1.24             |
| M1...M13 | 34.48                                 | -3.04                                         | 1.83             | 0.77             |
| M1...M14 | 7.28                                  | -2.92                                         | 0.39             | 0.74             |
| M1...M15 | 17.9                                  | -4.54                                         | 0.95             | 1.14             |
| M1...M16 | 14.30                                 | -6.19                                         | 0.76             | 1.56             |
| M1...M17 | 7.76                                  | 0.38                                          | 0.41             | -0.10            |
| M1...M18 | 0.15                                  | -0.14                                         | 0.01             | 0.03             |
| M1...M19 | 11.4                                  | -3.75                                         | 0.60             | 0.95             |
| M1...M20 | 10.3                                  | -3.77                                         | 0.55             | 0.95             |
| Total    | 358.72                                | -75.44                                        | 19.00            | 19.00            |

## 6. Normalized data

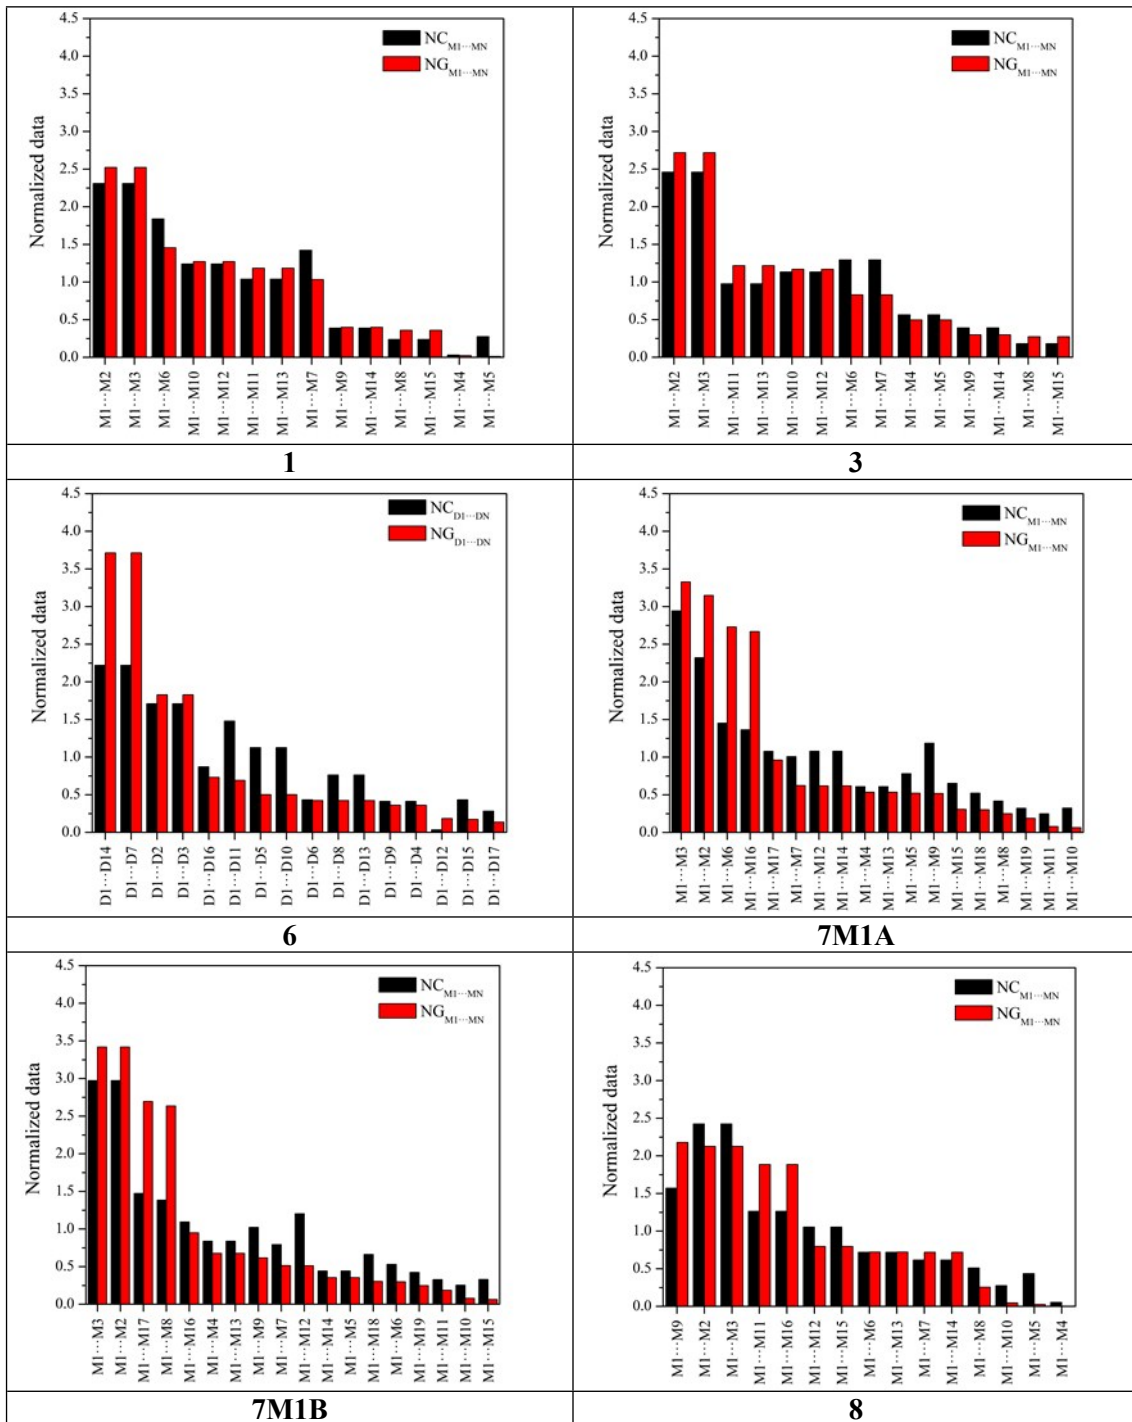



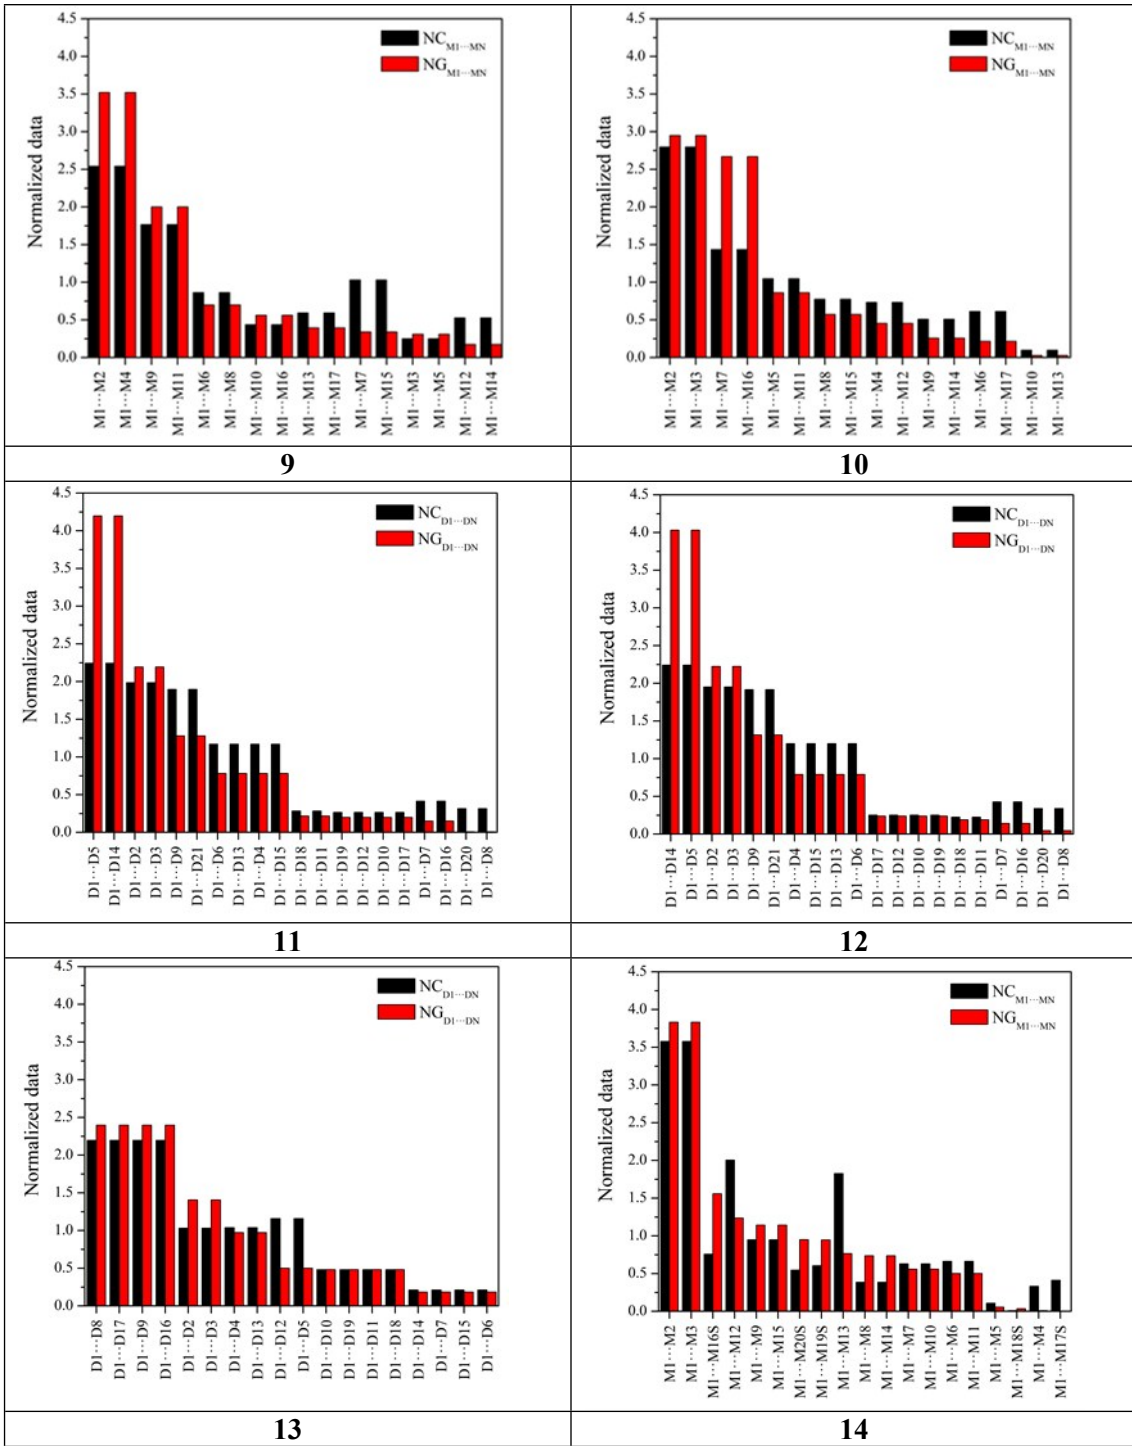

## 7. Concentration dependent $^1\text{H}$ -NMR experiments

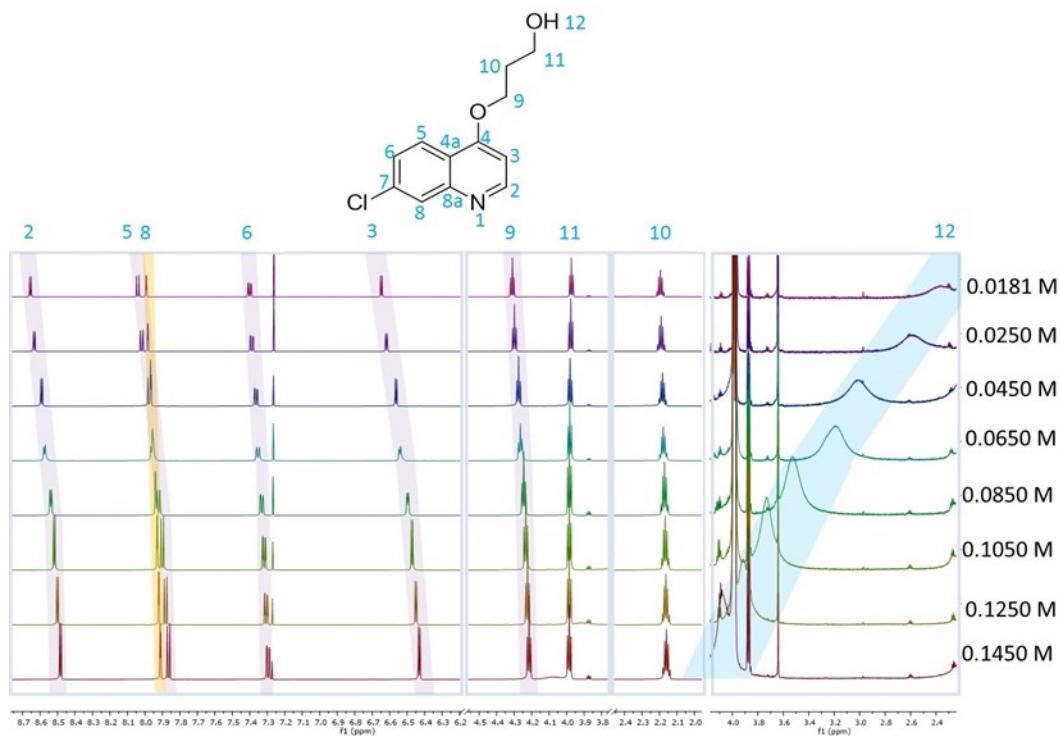

**Figure S30.** Concentration-dependent  $^1\text{H}$ -NMR experiments of compound **5** using  $\text{CDCl}_3$ .

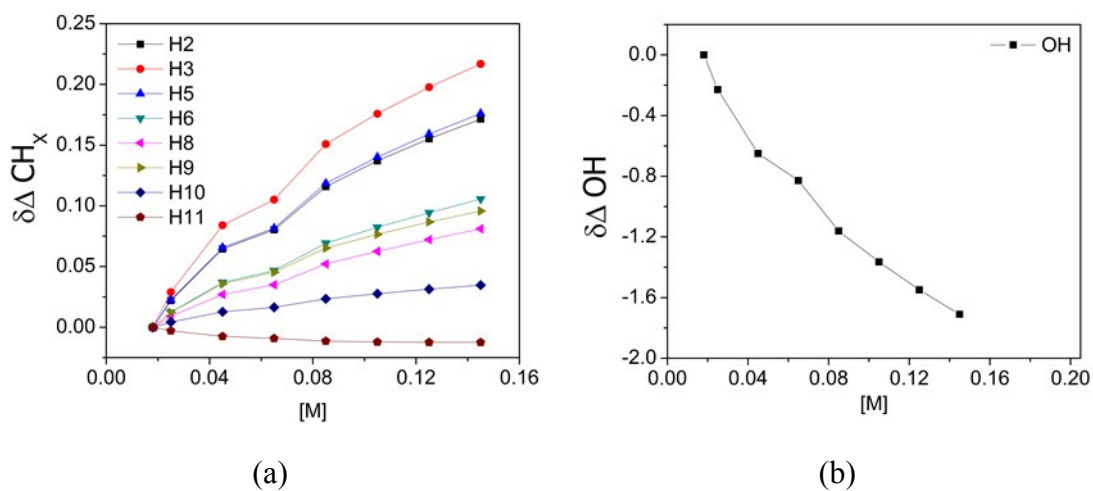

**Figure S31.** Concentration-dependent  $^1\text{H}$ -NMR chemical shift changes of signals of (a)  $\text{CH}_x$  and (b) OH for compound **5**, in  $\text{CDCl}_3$ .

## 8. Crystallization Mechanisms

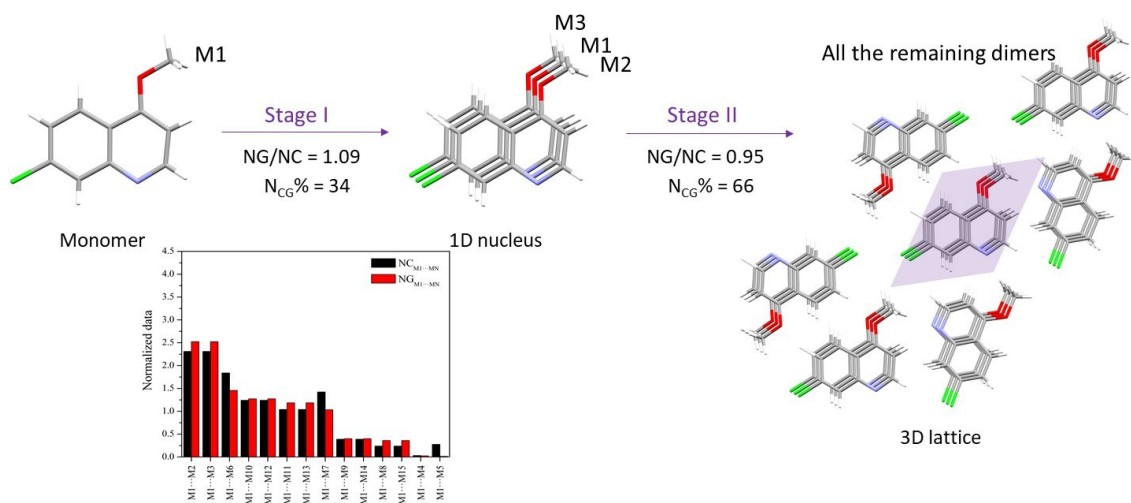

**Figure S32.** Crystallization mechanism for compound 1. The shaded area represents the portion of the previous stage.

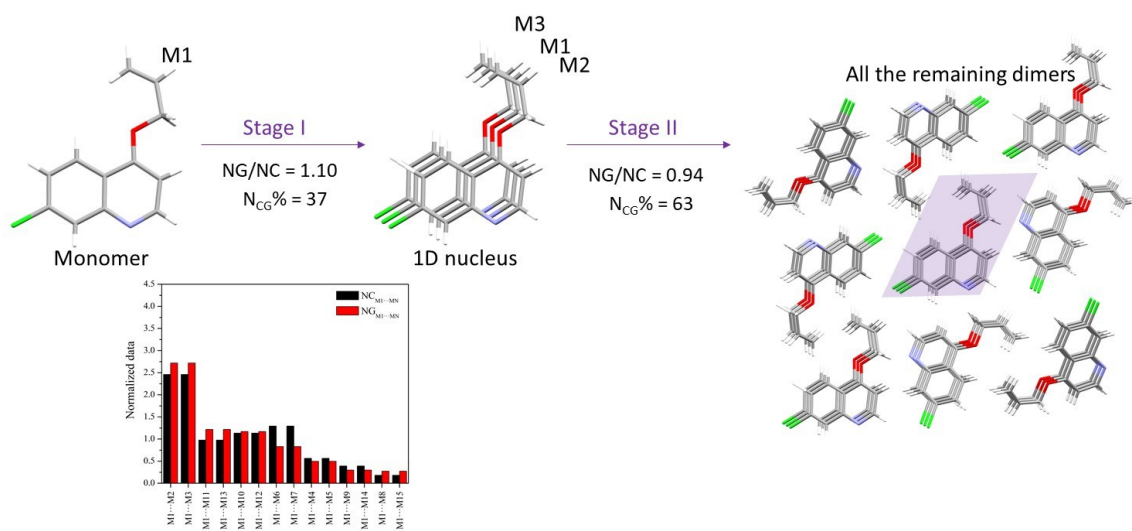

**Figure S33.** Crystallization mechanism for compound 3. The shaded area represents the portion of the previous stage.

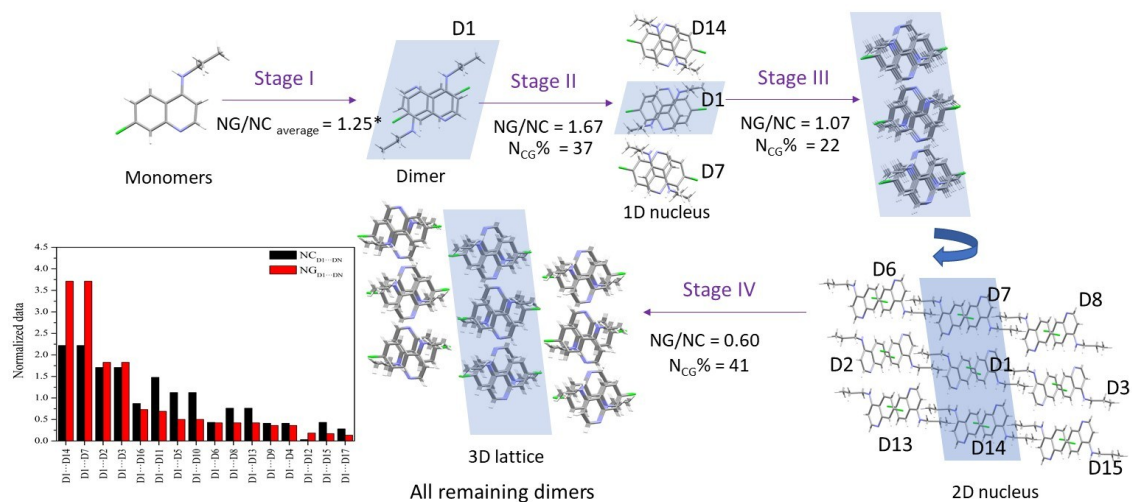

**Figure S34.** Crystallization mechanism of compound 6. Dimer formed between M1A and M1B molecules considered as new reference D1 (dimer 1). The shaded area represents the portion of the previous stage. \*NG/NC calculated from the supramolecular cluster considering the central molecule as the monomer M1

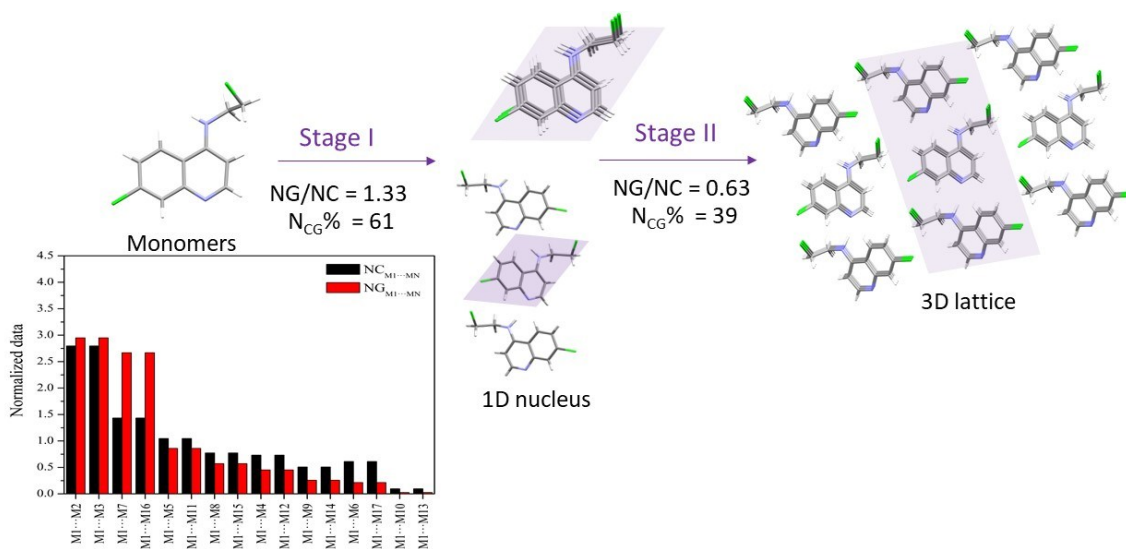

**Figure S35.** Crystallization mechanism for compound 10. The shaded area represents the portion of the previous stage.

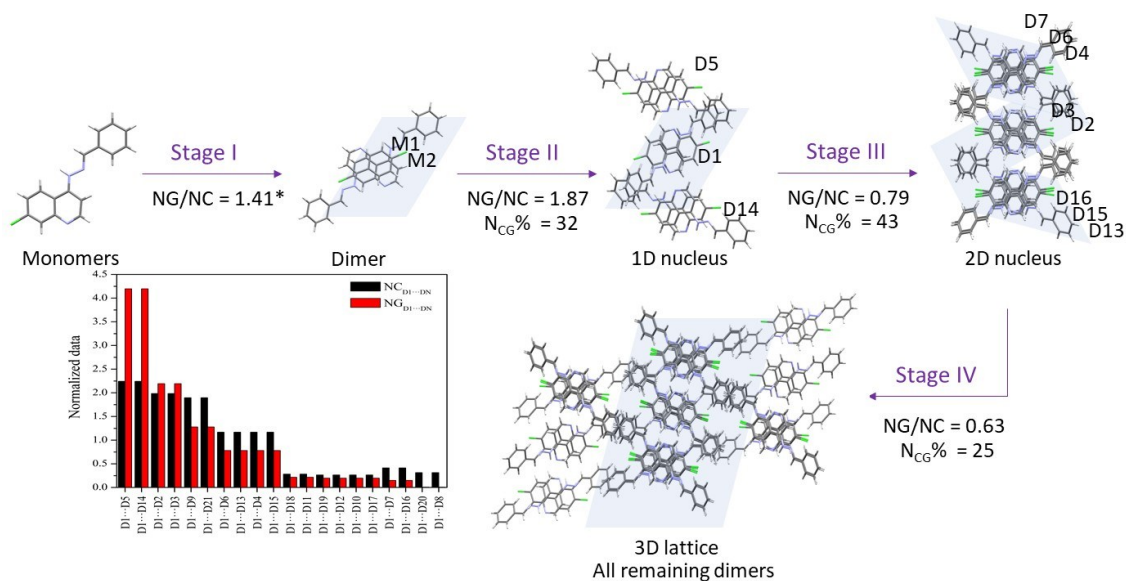

**Figure S36.** Crystallization mechanism for compound **11**. Dimer formed between M1A and M1B molecules considered as new reference D1 (dimer 1). The shaded area represents the portion of the previous stage. \*NG/NC calculated from the supramolecular cluster considering the central molecule as the monomer M1.

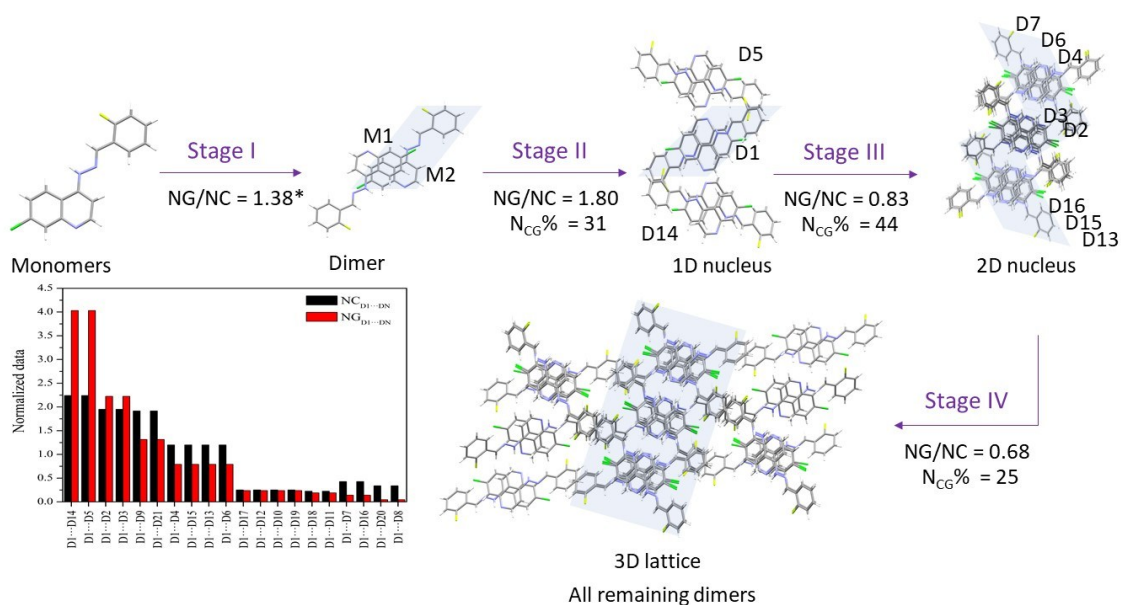

**Figure S37.** Crystallization mechanism for compound **12**. Dimer formed between M1A and M1B molecules considered as new reference D1 (dimer 1). The shaded area represents the portion of the previous stage. \*NG/NC calculated from the supramolecular cluster considering the central molecule as the monomer M1.

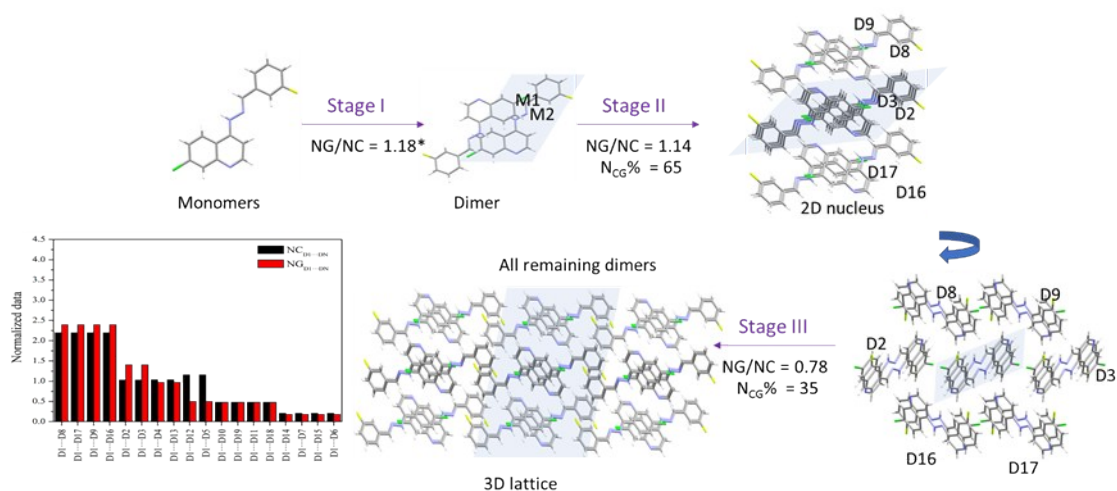

**Figure S38.** Crystallization mechanism for compound 13. Dimer formed between M1A and M1B molecules considered as new reference D1 (dimer 1). The shaded area represents the portion of the previous stage. \*NG/NC calculated from the supramolecular cluster considering the central molecule as the monomer M1.

## 9. QTAIM Data

**Table S31.** Intermolecular interactions paths data for compound **4**.

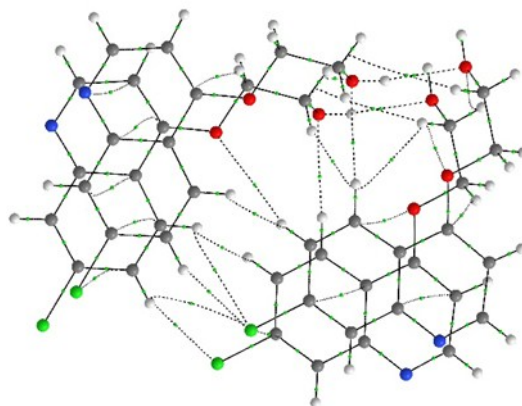

| Atoms       | Interaction            | $\rho_{\text{int}}$<br>(a.u.) | $\nabla^2\rho$ | $\mathcal{E}$ | $G_{\text{AI}(X\cdots Y)}$<br>(kcal mol <sup>-1</sup> ) | %      |
|-------------|------------------------|-------------------------------|----------------|---------------|---------------------------------------------------------|--------|
| N1' - C3'   | arylN $\cdots\pi$      | 0.002761                      | 0.007936       | 2.231469      | -0.67                                                   | 1.81   |
| H5 - H43D   | arylCH $\cdots$ HC     | 0.004122                      | 0.017248       | 0.661928      | -1.00                                                   | 2.70   |
| H5 - H43A   | CH $\cdots$ HC         | 0.001765                      | 0.006996       | 0.604329      | -0.43                                                   | 1.15   |
| H5' - H6    | arylCH $\cdots$ HCaryl | 0.003806                      | 0.016616       | 1.925313      | -0.92                                                   | 2.49   |
| H6 - H5'    | arylCH $\cdots$ HCaryl | 0.003791                      | 0.016673       | 1.924715      | -0.92                                                   | 2.48   |
| H5 - O44'   | arylCH $\cdots$ OH     | 0.007171                      | 0.021572       | 0.042175      | -1.74                                                   | 4.69   |
| H5 - O44'   | arylCH $\cdots$ OH     | 0.007068                      | 0.021410       | 0.028068      | -1.71                                                   | 4.62   |
| H6 - O41'   | arylCH $\cdots$ O      | 0.001664                      | 0.007394       | 0.603007      | -0.40                                                   | 1.09   |
| C5 - O41    | O $\cdots\pi$          | 0.004145                      | 0.013768       | 0.312594      | -1.00                                                   | 2.71   |
| C7 - C4A    | $\pi\cdots\pi$         | 0.005563                      | 0.014465       | 0.992107      | -1.35                                                   | 3.64   |
| C8A - C3    | $\pi\cdots\pi$         | 0.005367                      | 0.013303       | 0.691998      | -1.30                                                   | 3.51   |
| C8A - C4'   | $\pi\cdots\pi$         | 0.002910                      | 0.007451       | 0.777228      | -0.70                                                   | 1.90   |
| C8' - C4A'  | $\pi\cdots\pi$         | 0.003263                      | 0.007830       | 1.286325      | -0.79                                                   | 2.13   |
| C7' - C5'   | $\pi\cdots\pi$         | 0.003117                      | 0.007939       | 3.998503      | -0.75                                                   | 2.04   |
| C11 - C6    | Cl $\cdots\pi$         | 0.005669                      | 0.015954       | 2.210964      | -1.37                                                   | 3.71   |
| C11' - C6'  | Cl $\cdots\pi$         | 0.003788                      | 0.010024       | 2.473938      | -0.92                                                   | 2.48   |
| C11 - H6'   | Cl $\cdots$ HCaryl     | 0.004032                      | 0.013941       | 0.200826      | -0.98                                                   | 2.64   |
| C11 - H6'   | Cl $\cdots$ HCaryl     | 0.003030                      | 0.011796       | 1.340255      | -0.73                                                   | 1.98   |
| C11 - H5'   | Cl $\cdots$ HCaryl     | 0.003667                      | 0.012886       | 0.324778      | -0.89                                                   | 2.40   |
| H66' - C11  | Cl $\cdots$ HCaryl     | 0.004063                      | 0.013916       | 0.203529      | -0.98                                                   | 2.66   |
| C4' - H42C  | CH $\cdots\pi$         | 0.003121                      | 0.010422       | 0.482405      | -0.76                                                   | 2.04   |
| C4 - H42B   | CH $\cdots\pi$         | 0.004034                      | 0.013766       | 0.288573      | -0.98                                                   | 2.64   |
| O41 - H43A  | O $\cdots$ HC          | 0.002461                      | 0.012116       | 0.240344      | -0.60                                                   | 1.61   |
| O44 - H43B  | HO $\cdots$ HC         | 0.004719                      | 0.022610       | 1.292587      | -1.14                                                   | 3.09   |
| O44' - H43C | OH $\cdots$ HC         | 0.007854                      | 0.032983       | 0.543375      | -1.90                                                   | 5.14   |
| O44 - O44'  | HO $\cdots$ OH         | 0.021760                      | 0.073320       | 0.011993      | -5.27                                                   | 14.23  |
| O44 - O44'  | O $\cdots$ O           | 0.021818                      | 0.073505       | 0.013371      | -5.28                                                   | 14.27  |
| H43A - C43' | CH $\cdots$ CH         | 0.003208                      | 0.015211       | 0.216802      | -0.78                                                   | 2.10   |
| H43A - C43' | CH $\cdots$ CH         | 0.003201                      | 0.015196       | 0.190886      | -0.77                                                   | 2.09   |
| Total       |                        | 0.152938                      |                |               | -37.03                                                  | 100.00 |

**Table S32.** Intermolecular interactions paths data for compound **5**.

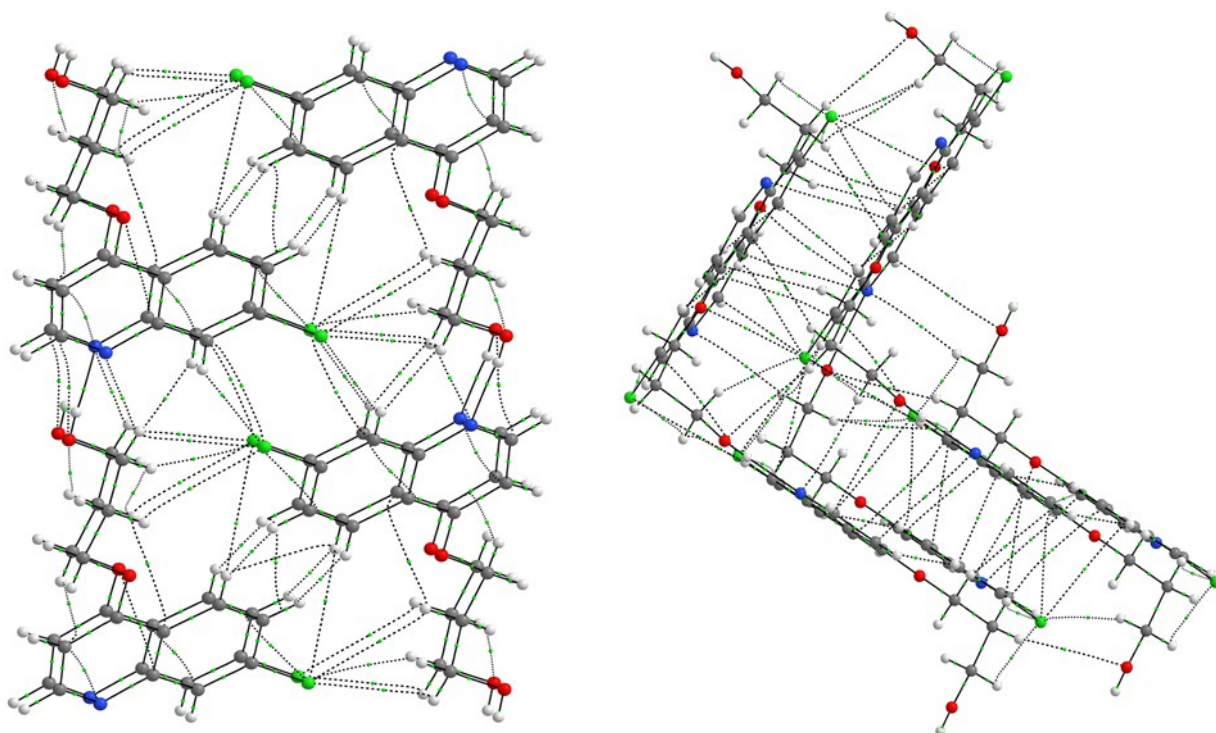

| Atoms       | Interaction        | $\rho_{\text{int}}$<br>(a.u.) | $\nabla^2\rho$ | $\mathcal{E}$ | $G_{\text{AI}(X\cdots Y)}$<br>(kcal mol <sup>-1</sup> ) | %    |
|-------------|--------------------|-------------------------------|----------------|---------------|---------------------------------------------------------|------|
| H44A - H43B | CH $\cdots$ HC     | 0.001059                      | 0.004422       | 0.801276      | -0.34                                                   | 0.34 |
| H43B - H44A | CH $\cdots$ HC     | 0.001063                      | 0.004416       | 0.898742      | -0.35                                                   | 0.35 |
| H9 - Cl2    | Cl $\cdots$ HCaryl | 0.001407                      | 0.004899       | 5.811998      | -0.46                                                   | 0.46 |
| Cl1 - H9'   | Cl $\cdots$ HCaryl | 0.001554                      | 0.005407       | 4.518278      | -0.51                                                   | 0.51 |
| Cl1 - H9'   | Cl $\cdots$ HCaryl | 0.001565                      | 0.005444       | 4.453615      | -0.51                                                   | 0.51 |
| H6 - Cl2    | Cl $\cdots$ HCaryl | 0.002236                      | 0.00784        | 0.632562      | -0.73                                                   | 0.73 |
| H6 - Cl2    | Cl $\cdots$ HCaryl | 0.002237                      | 0.007835       | 0.637547      | -0.73                                                   | 0.73 |
| Cl1 - H6'   | Cl $\cdots$ HCaryl | 0.002358                      | 0.008237       | 0.539232      | -0.77                                                   | 0.77 |
| Cl1 - H6'   | Cl $\cdots$ HCaryl | 0.002363                      | 0.008257       | 0.539567      | -0.77                                                   | 0.77 |
| H44A - Cl2  | Cl $\cdots$ HC     | 0.001861                      | 0.00682        | 0.0380360     | -0.61                                                   | 0.61 |
| Cl2 - H44A  | Cl $\cdots$ HC     | 0.001902                      | 0.006892       | 0.071179      | -0.62                                                   | 0.62 |
| Cl1 - H44D  | Cl $\cdots$ HC     | 0.001928                      | 0.00704        | 0.041334      | -0.63                                                   | 0.63 |
| Cl1 - H44D  | Cl $\cdots$ HC     | 0.001954                      | 0.007088       | 0.084398      | -0.64                                                   | 0.64 |
| H43B - Cl2  | Cl $\cdots$ HC     | 0.003247                      | 0.011384       | 0.846664      | -1.06                                                   | 1.06 |
| H43B - Cl2  | Cl $\cdots$ HC     | 0.003258                      | 0.011418       | 0.792283      | -1.06                                                   | 1.06 |
| H43B - Cl2  | Cl $\cdots$ HC     | 0.003273                      | 0.011413       | 0.806699      | -1.07                                                   | 1.06 |
| H43B - Cl2  | Cl $\cdots$ HC     | 0.003298                      | 0.011463       | 0.800107      | -1.07                                                   | 1.07 |
| Cl1 - H43C  | Cl $\cdots$ HC     | 0.003754                      | 0.012957       | 0.487177      | -1.22                                                   | 1.22 |
| Cl1 - H43C  | Cl $\cdots$ HC     | 0.003764                      | 0.01292        | 0.45936       | -1.23                                                   | 1.22 |
| Cl1 - H43C  | Cl $\cdots$ HC     | 0.003764                      | 0.01293        | 0.474687      | -1.23                                                   | 1.22 |
| Cl1 - H43C  | Cl $\cdots$ HC     | 0.003789                      | 0.012984       | 0.473028      | -1.23                                                   | 1.23 |
| Cl1 - H44C  | Cl $\cdots$ HC     | 0.004733                      | 0.017085       | 0.201395      | -1.54                                                   | 1.54 |
| Cl1 - H44C  | Cl $\cdots$ HC     | 0.004745                      | 0.017166       | 0.211003      | -1.54                                                   | 1.54 |
| Cl1 - H44C  | Cl $\cdots$ HC     | 0.004752                      | 0.017274       | 0.214815      | -1.55                                                   | 1.55 |
| Cl1 - H44C  | Cl $\cdots$ HC     | 0.004761                      | 0.017091       | 0.198763      | -1.55                                                   | 1.55 |
| H44B - Cl2  | Cl $\cdots$ HC     | 0.004911                      | 0.017697       | 0.174534      | -1.60                                                   | 1.60 |
| H44A - Cl2  | Cl $\cdots$ HC     | 0.004913                      | 0.017513       | 0.161336      | -1.60                                                   | 1.60 |
| H44B - Cl2  | Cl $\cdots$ HC     | 0.004939                      | 0.017601       | 0.162323      | -1.61                                                   | 1.61 |



|             |                 |          |          |           |         |        |
|-------------|-----------------|----------|----------|-----------|---------|--------|
| H44A - C12  | Cl···HC         | 0.004969 | 0.01761  | 0.16038   | -1.62   | 1.62   |
| H6 - H6'    | arylCH···Hcaryl | 0.002501 | 0.011704 | 69.430646 | -0.81   | 0.81   |
| H6 - H7'    | arylCH···HCaryl | 0.003928 | 0.016854 | 0.156653  | -1.28   | 1.28   |
| H6 - H7'    | arylCH···HCaryl | 0.00394  | 0.016849 | 0.156249  | -1.28   | 1.28   |
| H6 - H7'    | arylCH···HCaryl | 0.003947 | 0.016891 | 0.158187  | -1.28   | 1.28   |
| H6 - H7'    | arylCH···HCaryl | 0.003964 | 0.016909 | 0.158354  | -1.29   | 1.29   |
| H7 - H6'    | arylCH···HCaryl | 0.004038 | 0.017269 | 0.140688  | -1.31   | 1.31   |
| H7 - H6'    | arylCH···HCaryl | 0.00404  | 0.017252 | 0.138652  | -1.32   | 1.31   |
| H7 - H6'    | arylCH···HCaryl | 0.004046 | 0.017238 | 0.137874  | -1.32   | 1.32   |
| H7 - H6'    | arylCH···HCaryl | 0.004061 | 0.017282 | 0.140223  | -1.32   | 1.32   |
| H9 - H44B   | arylCH···HC     | 0.003875 | 0.016306 | 0.400794  | -1.26   | 1.26   |
| H9' - H44C  | arylCH···HC     | 0.004434 | 0.018576 | 0.353743  | -1.44   | 1.44   |
| H9' - H44C  | arylCH···HC     | 0.004458 | 0.018485 | 0.355366  | -1.45   | 1.45   |
| O45' - C2'  | HO··· $\pi$     | 0.002621 | 0.009935 | 0.663379  | -0.85   | 0.85   |
| O45 - C2    | HO··· $\pi$     | 0.002623 | 0.009735 | 0.442152  | -0.85   | 0.85   |
| C2 - O45    | HO··· $\pi$     | 0.002656 | 0.009776 | 0.424895  | -0.86   | 0.86   |
| O45 - H43A  | HO···HC         | 0.002756 | 0.011478 | 0.028915  | -0.90   | 0.90   |
| O45 - H43A  | HO···HC         | 0.002795 | 0.011459 | 0.017962  | -0.91   | 0.91   |
| H43D - O45' | HO···HC         | 0.00305  | 0.012315 | 0.02529   | -0.99   | 0.99   |
| O45' - H43D | HO···HC         | 0.003082 | 0.012289 | 0.016856  | -1.00   | 1.00   |
| N1' - C3'   | N··· $\pi$      | 0.003892 | 0.010242 | 0.802639  | -1.27   | 1.27   |
| C3' - N1'   | N··· $\pi$      | 0.003916 | 0.01038  | 0.753245  | -1.27   | 1.27   |
| N1 - C3     | N··· $\pi$      | 0.004011 | 0.010485 | 0.665917  | -1.31   | 1.30   |
| N1 - C3     | N··· $\pi$      | 0.004048 | 0.010661 | 0.620782  | -1.32   | 1.32   |
| C10 - O41   | O··· $\pi$      | 0.004058 | 0.01452  | 3.748196  | -1.32   | 1.32   |
| C10 - O41   | O··· $\pi$      | 0.004065 | 0.014524 | 4.360813  | -1.32   | 1.32   |
| N1 - H44B   | N···HC          | 0.00426  | 0.014282 | 0.230274  | -1.39   | 1.39   |
| N1 - H44B   | N···HC          | 0.004283 | 0.014087 | 0.236344  | -1.39   | 1.39   |
| H44C - N1'  | N···HC          | 0.004644 | 0.015041 | 0.262329  | -1.51   | 1.51   |
| H43C - C5'  | CH··· $\pi$     | 0.00428  | 0.013818 | 2.011099  | -1.39   | 1.39   |
| C51 - H43C  | CH··· $\pi$     | 0.004297 | 0.013851 | 2.028717  | -1.40   | 1.40   |
| C5 - H43B   | CH··· $\pi$     | 0.004521 | 0.014797 | 1.574246  | -1.47   | 1.47   |
| C5 - H43B   | CH··· $\pi$     | 0.004525 | 0.014802 | 1.57094   | -1.47   | 1.47   |
| H42C - C4'  | CH··· $\pi$     | 0.005244 | 0.016274 | 2.5673    | -1.71   | 1.71   |
| H42C - C4'  | CH··· $\pi$     | 0.005245 | 0.016295 | 2.537219  | -1.71   | 1.71   |
| H42B - C3   | CH··· $\pi$     | 0.005463 | 0.016537 | 1.725602  | -1.78   | 1.78   |
| H42B - C3   | CH··· $\pi$     | 0.005464 | 0.016546 | 1.730371  | -1.78   | 1.78   |
| C9 - C5     | $\pi$ ··· $\pi$ | 0.004384 | 0.011142 | 3.190047  | -1.43   | 1.43   |
| C9' - C5'   | $\pi$ ··· $\pi$ | 0.004384 | 0.011167 | 4.488396  | -1.43   | 1.43   |
| C5' - C9'   | $\pi$ ··· $\pi$ | 0.004414 | 0.011211 | 4.850084  | -1.44   | 1.44   |
| C9 - C5     | $\pi$ ··· $\pi$ | 0.004424 | 0.011211 | 3.415023  | -1.44   | 1.44   |
| C7 - H7'    | arylCH··· $\pi$ | 0.005783 | 0.024475 | 7.676948  | -1.88   | 1.88   |
| C7 - H7'    | arylCH··· $\pi$ | 0.005802 | 0.024368 | 6.558891  | -1.89   | 1.89   |
| C11 - C7    | Cl··· $\pi$     | 0.005804 | 0.014905 | 0.746527  | -1.89   | 1.89   |
| C12 - C7'   | Cl··· $\pi$     | 0.005821 | 0.014937 | 0.768373  | -1.89   | 1.89   |
| C11 - C7    | Cl··· $\pi$     | 0.005831 | 0.01496  | 0.724379  | -1.90   | 1.90   |
| C12 - C7'   | Cl··· $\pi$     | 0.00586  | 0.015009 | 0.745716  | -1.91   | 1.91   |
| C11 - C9'   | Cl··· $\pi$     | 0.007153 | 0.021304 | 0.396326  | -2.33   | 2.33   |
| C12 - C9    | Cl··· $\pi$     | 0.007244 | 0.021629 | 0.465732  | -2.36   | 2.36   |
| C12 - C9    | Cl··· $\pi$     | 0.007245 | 0.021642 | 0.4719    | -2.36   | 2.36   |
| Total       |                 |          |          |           | -100.11 | 100.00 |

## 10. References

- 1 J. K. Natarajan, J. N. Alumasa, K. Yearick, K. A. Ekoue-Kovi, L. B. Casabianca, A. C. de Dios, C. Wolf and P. D. Roepe, *J. Med. Chem.*, 2008, **51**, 3466–3479.
- 2 K. Oukoloff, N. Coquelle, M. Bartolini, M. Naldi, R. Le Guevel, S. Bach, B. Josselin, S. Ruchaud, M. Catto, L. Pisani, N. Denora, R. M. Iacobazzi, I. Silman, J. L. Sussman, F. Buron, J. P. Colletier, L. Jean, S. Routier and P. Y. Renard, *Eur. J. Med. Chem.*, 2019, **168**, 58–77.
